## **Cytokinin inhibits fungal development and virulence by targeting the cytoskeleton and cellular trafficking**

Rupali Gupta<sup>1</sup>, Gautam Anand<sup>1</sup>, Lorena Pizarro<sup>1,2</sup>, Dana Laor<sup>3</sup>, Neta Kovetz<sup>1</sup>, Noa Sela<sup>1</sup>, Tal Yehuda<sup>3</sup>, Ehud Gazit<sup>3</sup> and Maya Bar<sup>1</sup>.

<sup>1</sup>*Department of Plant Pathology and Weed Research, ARO, Volcani Center, Rishon LeZion 7505101, Israel.*

<sup>2</sup>*Institute of Agri-food, Animal and Environmental Sciences, Universidad de O'Higgins, Chile.*

<sup>3</sup>*The Shmunis School of Biomedicine and Cancer Research, Tel Aviv University, Tel Aviv 6997801, Israel.*

Corresponding author: Maya Bar

[mayabar@volcani.agri.gov.il](mailto:mayabar@volcani.agri.gov.il)

ORCID: [0000-0002-7823-9121](https://orcid.org/0000-0002-7823-9121)

**Keywords:** cytokinin, cell cycle, cytoskeleton, endocytosis, *Botrytis cinerea*, *Saccharomyces cerevisiae*

## Abstract

Cytokinin (CK) is an important plant developmental regulator, having activities in many aspects of plant life and its response to the environment. CKs are involved in diverse processes in the plant, including stem-cell maintenance, vascular differentiation, growth and branching of roots and shoots, leaf senescence, nutrient balance and stress tolerance. In some cases, phytopathogens secrete CKs. It has been suggested that to achieve pathogenesis in the host, CK-secreting biotrophs manipulate CK signaling to regulate the host cell cycle and nutrient allocation. CK is known to induce host plant resistance to several classes of phytopathogens from a handful of works, with induced host immunity *via* salicylic acid signaling suggested to be the prevalent mechanism for this host resistance.

Here, we show that CK directly inhibits the growth, development, and virulence of fungal phytopathogens. Focusing on *Botrytis cinerea* (*Bc*), we demonstrate that various aspects of fungal development can be reversibly inhibited by CK. We also found that CK affects both budding and fission yeast in a similar manner. Investigating the mechanism by which CK influences fungal development, we conducted RNA-NGS on mock and CK treated *B. cinerea* samples, finding that CK inhibits the cell cycle, cytoskeleton, and endocytosis. Cell biology experiments demonstrated that CK affects cytoskeleton structure and cellular trafficking in *Bc*, lowering endocytic rates and endomembrane compartment sizes, likely leading to reduced growth rates and arrested developmental programs. Mutant analyses in yeast confirmed that the endocytic pathway is altered by CK.

Our work uncovers a remarkably conserved role for a plant growth hormone in fungal biology, suggesting that pathogen-host interactions resulted in fascinating molecular adaptations on fundamental processes in eukaryotic biology.

## Importance

Cytokinins (CKs), important plant growth/ developmental hormones, have previously been associated with host disease resistance. Here, we demonstrate that CK directly inhibits the growth, development, and virulence of *B. cinerea* (*Bc*) and many additional phytopathogenic fungi. Molecular and cellular analyses revealed that CK is not toxic to *Bc*, but rather, *Bc* likely recognizes CK and responds to it, resulting in cell cycle and individual cell growth retardation, via downregulation of cytoskeletal components and endocytic trafficking. Mutant analyses in yeast confirmed that the endocytic pathway is a CK target. Our work demonstrates a conserved role for CK in yeast and fungal biology, suggesting that pathogen-host interactions may cause molecular adaptations on fundamental processes in eukaryotic biology.

## 1 **Introduction**

2 Cytokinins (CKs) are a class of extensively studied plant hormones, well known for their  
3 involvement in various aspects of plant life (Mok & Mok, 2001; Sakakibara, 2006; Werner &  
4 Schmülling, 2009; Keshishian & Rashotte, 2015). Some findings have suggested a role for CKs  
5 in fungal pathogenesis (Walters & McRoberts, 2006; Babosha, 2009; Sharma *et al.*, 2010; Choi  
6 *et al.*, 2011). In some cases, plant pathogens can secrete CKs, or induce CK production in the  
7 host plant, possibly in order to achieve pathogenesis in the host (Jameson, 2000). Conidia,  
8 mycelia of some fungi, and germinating uredospores of *Puccinia graminis* and *P. recondite* have  
9 been shown to accumulate CK, manipulating CK signaling to regulate host plant cell cycle  
10 (Greene, 1980; Nieto & Frankenberger, 1991).

11 CK has also been shown to promote resistance to plant pathogens that do not secrete CK. High  
12 levels of CKs were found to increase the plants' resistance to bacterial and fungal pathogens  
13 (Swartzberg *et al.*, 2008; Choi *et al.*, 2010; Grosskinsky *et al.*, 2011; Ballaré, 2011; Gupta *et al.*,  
14 2020a,b). Different mechanisms have been suggested for this enhanced resistance. In  
15 *Arabidopsis*, it was suggested that CK-mediated resistance functions through salicylic acid (SA)  
16 dependent mechanisms (Choi *et al.*, 2010). An additional study suggested that CK signaling  
17 enhances the contribution of SA-mediated immunity in hormone disease networks (Naseem *et*  
18 *al.*, 2012). However, in tobacco, an SA-Independent, phytoalexin-dependent mechanism was  
19 suggested (Grosskinsky *et al.*, 2011). We recently reported that CK induces systemic immunity  
20 in tomato (*Solanum lycopersicum*), promoting resistance to fungal and bacterial pathogens  
21 (Gupta *et al.*, 2020a,b) including *Botrytis cinerea*, in an SA and ethylene dependent mechanism.  
22 *B. cinerea* (grey mold), *Sclerotium rolfsii* (collar rot), and *Fusarium oxysporum* f. sp. *lycopersici*  
23 (fusarium wilt) are widespread fungal plant pathogens that infect hundreds of plant species and

24 cause huge losses every year (Tsaouridou & Thanassouloupoulos, 2002; Williamson *et al.*, 2007;  
25 Dean *et al.*, 2012).

26 Given that CK can induce plant immunity and restrict phytopathogen growth in certain cases,  
27 direct effects of CK against phytopathogens are an intriguing possibility. A direct effect of CK  
28 on bacterial pathogens was ruled out in previous works (Naseem *et al.*, 2012; Gupta *et al.*, 2020a).  
29 Interestingly, CK did not affect germination and elongation of germ tubes, but strongly inhibited  
30 appressorium formation of *Erysiphe graminis*, an obligate biotrophic powdery mildew causing  
31 barley pathogen (Liu & Bushnell, 1986). Another work described an increase in germination of  
32 conidia of two *Erysiphe* powdery mildew pathogens, *E. graminis* and *E. cichoracearum*, in the  
33 presence of CK (Mishina *et al.*, 2002). Fungal pathogens of the species *Erysiphe* are known to  
34 produce CKs. High levels of CK was also reported to inhibit mycelial growth and pathogenesis  
35 of fungi in canola (Sharma *et al.*, 2010).

36 In this work, we investigate the direct effects of CK on fungal plant pathogens, demonstrating  
37 that CK directly inhibits the growth, development, and virulence of fungal plant pathogens. *B.*  
38 *cinerea* (*Bc*) growth, sporulation, and spore germination were all inhibited by CK, in the absence  
39 of a host plant. We found similar effects in a variety of plant pathogenic fungi. Molecular and  
40 cellular analyses revealed that CK is not toxic to *Bc*, but rather, *Bc* likely recognizes CK and  
41 responds to it, resulting in cell cycle and individual cell growth retardation. CK reduced *Bc*  
42 virulence in a reversible manner, confirming that no irreversible harm was caused to fungal  
43 development. RNAseq confirmed that CK downregulates the cell cycle and cytoskeleton, as well  
44 as cellular trafficking. Interestingly, we also found that CK affects two additional fungi from the  
45 ascomycota division that are not phytopathogens, but rather, yeasts. Both budding and fission  
46 yeast were inhibited by CK. Further to the effects observed in the RNAseq data, we confirmed  
47 that CK affects the cytoskeleton and cellular trafficking in *Bc*, mislocalizing actin filaments and  
48 lowering endocytic rates and endomembrane compartment sizes, likely underlying the reduced

49 growth rates and arrested developmental programs. Mutant analyses in yeast confirmed that the  
50 endocytic pathway is affected by CK. Our work uncovers a novel, remarkably conserved role for  
51 a primary plant growth hormone in fungal biology, demonstrating that interaction between  
52 pathogen and host resulted in fascinating molecular adaptations on fundamental processes in  
53 eukaryotic biology. In time, this may hold promise for the development of CKs as antifungal  
54 agents in specific cases.

55

## 56 **Results**

### 57 **Cytokinin inhibits disease caused by *B. cinerea* and *S. rolfsii*, but not *F. oxysporum* f. sp. 58 *lycopersici***

59 We have previously reported that CK reduces tomato disease by inducing immunity (Gupta *et*  
60 *al.*, 2020b). Fungal pathogens with different lifestyles have different infection and pathogenesis  
61 strategies, and host plants employ different protection mechanisms to resist different types of  
62 fungal pathogens. Three phytopathogenic fungi with varied lifestyles and infection modes were  
63 selected. *B. cinerea* (*Bc*), an airborne necrotrophic spore producing ascomycete, that causes gray  
64 mold disease in >1400 hosts (Fillinger & Elad, 2016); *S. rolfsii* (*Sr*)- a soilborne necrotrophic  
65 basidiomycete that does not produce spores, that causes southern blight disease in hundreds of  
66 hosts (Arnold, 2008); and *F. oxysporum* f. sp. *lycopersici* (*Fol*), a soilborne necrotrophic  
67 ascomycete that is known to produce CK (Vrabka *et al.*, 2018; Sørensen *et al.*, 2018), and causes  
68 wilt disease in a host specific manner (Stravato *et al.*, 1999). In order to examine the ability of  
69 CK to reduce disease caused by different fungal pathogens, we treated tomato plants with 100  
70  $\mu$ M CK (6-BAP) 24 hours prior to pathogen inoculation. **Fig. 1** details the effect of CK in tomato  
71 disease caused by different phytopathogens. 6-BAP pre-treatment significantly decreased disease  
72 levels caused by the necrotrophic fungal pathogens *Bc*, as we previously reported (Gupta *et al.*,

73 2020b) (**Fig. 1a**), and *Sr* (**Fig. 1b**). Upwards of 50% disease reduction in tomato plants was  
74 observed with *Bc* and *Sr* as compared to control (**Fig. 1 a,b**). However, no disease reduction was  
75 observed with *Fol* (**Fig. 1c**).

#### 76 **Cytokinin directly inhibits *B. cinerea*, *S. rolf sii*, and *F. oxysporum* f. sp. *lycopersici***

77 In order to examine a possible direct effect of CK on fungal tomato pathogens, we used the above  
78 three phytopathogenic fungi. The effects of different CK concentrations and derivatives on the  
79 growth of *Bc*, *Sr* and *Fol* mycelia are shown in **Fig. 1**. The cyclic synthetic CK 6-BAP (**Fig. 1d-**  
80 **k**), the natural cyclic CKs zeatin and kinetin (**Fig. 1k**), and the synthetic bacterial derived non-  
81 cyclic CK thidiazurn (TDZ, **Fig. 1k**)- all inhibited the growth of *B. cinerea*. 6-BAP (6-benzyl  
82 amino purine) inhibited the growth of *Bc* in a dose-dependent manner. Approximately 50%  
83 inhibition was observed at 100  $\mu$ M (**Fig. S1a**). *Sr* did not show growth reduction at 1  $\mu$ M but  
84 growth inhibition at 10  $\mu$ M and 100  $\mu$ M was similar to *Bc* (**Fig. S1b**). The least effect of 6-BAP  
85 was observed on *Fol* (**Fig. S1c**), which was not inhibited by CK treatment *in planta* (**Fig. 1c**).

86 To examine the breadth of this phenomenon, we tested *in vitro* growth of additional  
87 phytopathogenic fungi in the presence of 100  $\mu$ M 6-BAP or the control Adenine. Our results  
88 show that CK directly inhibits mycelial growth of fungal pathogens from several different classes  
89 (ascomycetes, basidiomycetes) and different lifestyles (hemibiotrophs, necrotrophs) (**Fig. S2**).  
90 All classes of phytopathogenic fungi tested were inhibited by CK (**Fig. S2a**), however, the level  
91 of inhibition also differed significantly among them, with *Fusarium* spp. showing the least  
92 inhibition (**Fig. S2b**). The phylogeny is detailed in **Fig. S2c**, and does not indicate that the ability  
93 to be inhibited by CK is specific to any particular class or taxon.

#### 94 **Cytokinin inhibits *B. cinerea* sporulation, spore germination, and germ tube elongation**

95 We studied the effect of CK fungal development: sporulation, spore germination, and germ tube  
96 elongation. In samples treated with 100 nM CK, there were approximately 50% less spores

97 produced as compared to mock (**Fig. 2a,b**). The effect of CK on spore germination was even  
98 more pronounced (**Fig. 2c,d**). Less than 50% of the spores germinated with 100 nM CK.  
99 Interestingly, though less spores germinated in the presence of 6-BAP, the spores that did  
100 germinate had accelerated germ tube growth in 100 nM 6-BAP, and inhibited germ tube growth  
101 100  $\mu$ M 6-BAP (**Fig. 2c,e**). After 8 hours of growth with 100  $\mu$ M 6-BAP, the germ tube length  
102 was 50% of the control (**Fig. 2e**), correlating with ~50% inhibition in mycelial growth (**Fig.**  
103 **1d,e,j,k**).

104 LC/MS Hormonal measurements in mature tomato leaves demonstrate that they can contain close  
105 to 100 ng/g active CKs (**Fig. S3**), as was previously reported for tomato leaves (Ghanem *et al.*,  
106 2008; Žižková *et al.*, 2015). This amount roughly corresponds, depending on the CK derivative,  
107 to 400-500 nM, which did not affect mycelial growth of the phytopathogenic fungi we tested  
108 (**Fig. S1**), but did inhibit sporulation and spore germination in *B. cinerea* (**Fig. 2b-d**).

### 109 **Cytokinin reversibly attenuates *B. cinerea* virulence**

110 Is direct CK inhibition of phytopathogenic fungi reversible? Or does CK irreversibly harm fungal  
111 development? Furthermore, since some aspects of *Bc* development are inhibited in CK  
112 concentrations normally found within plant leaves (**Figs. 2, S3**), how does CK affect fungal  
113 virulence? To answer these questions, we harvested *Bc* spores from fungi grown with or without  
114 CK, normalized the spore count to  $10^5$  spores/mL, and used equal amounts of spores to infect  
115 tomato leaves. When spores harvested from mycelia grown with 6-BAP were used for infecting  
116 tomato leaves, no reduction in lesion size was observed as compared with spores grown without  
117 CK (**Fig. 3a**). We harvested spores from mycelia grown without CK, mixing half the spores with  
118 CK just prior to tomato leaf infection. When spores were treated with CK prior to infection, there  
119 was approximately 40% reduction in lesion area (**Fig. 3b**), comparable to disease reduction  
120 observed when treating plants with CK (**Fig. 1a**).

121 CK differentially down-regulated the expression levels of virulence genes in *Bc* (**Fig. 3c**). All  
122 tested genes related to virulence viz., *BcPGI* (endopolygalacturonase), *BcXynI*, *BcXynI0A* and  
123 *BcXynI1C* (Xylanases), *BcPME1* (pectin methylesterase), *BcPLC1* (phospholipase C), *BcBMPI*  
124 (mitogen-activated protein (MAP) kinase) and *BcPLS1* (tetraspanin) were expressed at  
125 significantly lower levels upon growth in the presence of 100  $\mu$ M of 6-BAP. In addition, the  
126 expression of the woronin body protein *Bchex*, known to be involved in fungal membrane  
127 integrity (Torres-Ossandón *et al.*, 2019), was down-regulated upon CK treatment. . Gene  
128 expression was normalized to a geometric mean of 3 housekeeping genes: ubiquitin-conjugating  
129 enzyme E2 (*ubce*) (Silva-Moreno *et al.*, 2016), Iron-transport multicopper oxidase, and  
130 Adenosine deaminase (Llanos *et al.*, 2015).

131

### 132 **Cytokinin is not toxic to *B. cinerea***

133 Why is CK inhibiting fungal growth and development? Spores generated from fungus grown in  
134 the presence of CK were able to infect tomato leaves normally, once removed from the CK  
135 containing environment, indicating that the spores themselves were normal, and that disease  
136 reduction stems from a reduction in spore formation, spore germination, and germ tube growth  
137 (**Fig. 3**). To confirm that CK is not killing fungal cells, we examined fungal cellular leakage in  
138 the presence of CK. As shown in **Fig. 4a,b**, no significant leakage of nucleic acids and proteins  
139 were observed after 24 h treatment with 100  $\mu$ M 6-BAP, when compared to the control.  
140 Additionally, no change in electrical conductivity was observed upon 24 hours of 100  $\mu$ M 6-  
141 BAP treatment (**Fig. 4c**). The high background measurements with CK alone are likely due to  
142 the presence of the aromatic ring structure. These results confirm that CK is not toxic to *Bc*.

### 143 **Transcriptome profiling reveals pathways affected by CK in *B. cinerea***



144 To gain insight into the effects CK has on the fungus, we conducted transcriptome profiling on  
145 *Bc* samples prepared from fungi grown with and without CK. Principle component analysis  
146 demonstrated that the biological replicates were clustered well together (**Fig. 5a**), with mock  
147 samples being very similar, and CK samples clustering together across PC1 (75%). The  
148 comparison yielded two clusters, exemplified in a heatmap (**Fig. 5b**): genes downregulated by  
149 CK when compared with mock (bottom cluster, marked in red) and genes upregulated by CK  
150 when compared with mock (top cluster, marked in green). Individual genes having a  $\log_2$ Fold-  
151 change of  $\geq 2$  or greater are provided in **Supplementary Data 1**. Interestingly, out of the 660  
152 differentially expressed genes (DEGs), 470 were down regulated, indicating that CK has more  
153 of a suppressive effect on the *Bc* transcriptome. Distribution of DEGs into various biological  
154 pathways in Kyoto Encyclopedia of Genes and Genomes (KEGG) also supports this.  
155 Downregulated KEGG pathways included various pathways related to the cell cycle and DNA  
156 replication (**Fig. 5c**), as well as endocytosis, MAPK signaling, and a variety of metabolic  
157 pathways (**Fig. 5c**). The full KEGG list with adjusted p-values for each pathway is provided in  
158 **Supplementary data 2**. Upregulated KEGG pathways included various pathways related to  
159 protein biosynthesis and processing (**Fig. 5d**), as well as the peroxisome and phagosome (**Fig.**  
160 **5d**). The full KEGG list with adjusted p-values for each pathway is provided in **Supplementary**  
161 **data 3**.

162

### 163 **Cytokinin affects the fungal cell cycle**

164 Since we observed that CK inhibits sporulation, spore germination, and hyphal growth, and the  
165 cell cycle and DNA replication were down regulated by CK treatment in the transcriptome  
166 analysis, we examined the morphology and relative DNA quantity of *Bc* cells grown with and  
167 without CK (**Fig. 6**). We observed a significant reduction of  $\sim 75\%$  in cell size upon CK treatment,

168 with cells also appearing rounder (**Fig. 6a,b,d**). The distance between the last two septa from the  
169 hyphal tip were reduced to about 30% of normal length (**Fig. 6e**). 8 hours after germination, CK  
170 grown hyphae produced less than half the number of septa when compared with mock grown  
171 hyphae (**Fig. 6f**), further confirming that cell replication is inhibited. Concurrently, we quantified  
172 Hoechst staining in mock and CK grown mycelia. Hoechst binds to DNA and has been used  
173 before to estimate DNA content in live cell nuclei (Gomes *et al.*, 2018). CK grown cells were  
174 stained by Hoechst less than 50% of the amount of stain observed in mock grown cells (**Fig.**  
175 **6c,g**). Images were taken under identical conditions. Reduction in Hoechst staining coupled with  
176 lower rates of cell replication and the transcriptomic data indicating downregulation of cell cycle  
177 and meiosis pathways, indicates that CK may be inhibiting mitosis in *Bc*.

178

### 179 **Cytokinin inhibits the fungal cytoskeleton**

180 Our results demonstrate that CK inhibits fungal growth and development (**Figs. 1,2,5**). We  
181 hypothesized that CK affects a fundamental cellular process relevant to most fungi; a process  
182 that is crucial to execute the fast growth occurring in hyphal tips (Bartnicki-Garcia, 2002), growth  
183 that requires membrane remodeling (Riquelme *et al.*, 2018). Based on the NGS results, we  
184 hypothesized that these affected processes, in addition to the cell cycle, are likely to be  
185 cytoskeletal integrity and/or cellular trafficking.

186 To examine cytoskeleton integrity, we first validated the expression levels of cytoskeletal genes  
187 shown to be differential in the transcriptomic data. These genes are listed in **Fig. 7a** (saturated  
188 blue color indicates downregulation), with the full expression data provided in **Supplementary**  
189 **Data 4**. We independently confirmed relative expression of 5 genes from the data set by qRT-  
190 PCR, selecting both down regulated and up-regulated genes from the transcriptome (**Fig.7b**). As  
191 such, we used the geometric mean of 3 housekeeping genes that are unrelated to the cytoskeleton

192 for gene expression normalization. We transformed *B. cinerea* with the filamentous actin marker  
193 lifeactin-GFP (Schumacher, 2012), and proceeded to treat the transformed fungal cells with CK.  
194 We observed mislocalization of life-actin, which is normally localized to growing hyphal tips  
195 (Walker & Garrill; Berepiki *et al.*, 2011), upon CK treatment. CK caused life-actin to be  
196 distributed more uniformly throughout the cells, and to lose most of its tip-specific localization  
197 (**Fig. 7c-d**). Analysis of corrected total fluorescence in mock and CK treated cells demonstrated  
198 that the ratio between life-actin in the tip of the cell, and the total cell, decreased greatly in the  
199 presence of CK (**Fig. 7d**). Note that the transformed fungus showed the characteristic "split tips"  
200 phenotype of lifeactin overexpression (Schumacher, 2012) in both mock and CK treated samples.

201

## 202 **Cytokinin inhibits fungal endocytosis**

203 We and others (Marhavý *et al.*, 2011; Gupta *et al.*, 2020b) have previously shown that CK can  
204 influence cellular trafficking in plants. Further to our results demonstrating that CK inhibits the  
205 cytoskeleton in *Bc*, and since the endocytic pathway was also found to be significantly  
206 downregulated by CK (**Fig. 5**), we examined the effect of CK on endocytosis in *Bc*. **Fig. 8** shows  
207 that 6-BAP inhibits endocytosis of the endocytic tracer FM-4-64, which is routinely used in fungi  
208 (Fischer-Parton *et al.*, 2000), reducing the amount of endocytic vesicles by more than 50% (**Fig.**  
209 **8a,b**). 6-BAP also caused a significant decrease in the size of the vesicles containing endocytic  
210 tracer (**Fig. 8c**), in both the 100 nM and 100 uM concentrations, similar to its effect on sporulation  
211 and spore germination (**Fig. 2**). This suggests that in parallel with the effect on the cytoskeleton,  
212 CK has a possible impact on membrane function and/ or fission of vesicles.

## 213 Inhibition of endocytosis abolishes *B. cinerea* CK sensitivity

214 To further examine the effect of CK on endocytosis inhibition in *Bc*, we examined combined  
215 effects of CK and endocytosis inhibition using butanol treatments. 1-butanol inhibits

216 phospholipases (Motes *et al.*, 2005; Jia & Li, 2018), which have been linked to both growth and  
217 virulence in *Bc* (Schumacher *et al.*, 2008) (see also **Fig. 3**), and was used as an endocytosis  
218 inhibitor in previous works in fungi (Boucrot *et al.*, 2006; Sharfman *et al.*, 2011; Li *et al.*, 2012).  
219 We examined CK-mediated growth inhibition of both mycelia area and dry weight, in the  
220 presence or absence of the endocytosis inhibitor 1-butanol, as well as its structural analog 2-  
221 butanol, which does not inhibit endocytosis (Sharfman *et al.*, 2011). **Fig. S4** demonstrates that  
222 upon endocytosis inhibition with 1-butanol, CK no longer affects fungal growth, while CK-  
223 mediated growth inhibition is retained in the mock and 2-butanol treatments. (**Fig. S4 a,b**). At  
224 0.4%, 2-butanol did not inhibit fungal growth. At 0.8%, fungal growth inhibition was observed  
225 with 2-butanol, though to a significantly lesser degree than that observed with 1-butanol (**Fig.**  
226 **S4a**).

#### 227 Inhibition of the cytoskeleton abolishes *B. cinerea* CK sensitivity

228 We further examined combined effects of CK and cytoskeleton disruption, using Benomyl (Ben)  
229 and Latrunculin B (LatB). Benomyl depolymerizes microtubules, and has been previously used  
230 as a fungicide, and in studies of fungal cell cycle and cytoskeleton (Momany & Hamer, 1997;  
231 Peterson & Mitchison, 2002; Dub *et al.*, 2013). Latrunculin B depolymerizes actin filaments, and  
232 has also previously been used for cytoskeletal studies in fungi (Ketelaar *et al.*, 2012). We assayed  
233 the combined effect of CK and Ben or LatB on endocytosis, assaying endosome size and density.  
234 We observed that CK and Ben (**Fig. S5a,c**) or LatB (**Fig. S5b,d**) affect endocytic compartments  
235 in a similar manner, finding no enhancement of endocytosis inhibition when CK was combined  
236 with either drug (**Fig. S5**), suggesting that CK may inhibit endocytosis in part through its effect  
237 on the cytoskeleton, though down regulation of endocytic genes is also present (**Fig. 5**).

238 We also examined the combined effect of CK and Ben or LatB on growth inhibition of fungal  
239 mycelia. **Fig. S6** demonstrates that Ben and LatB mediated growth inhibition is not further

240 enhanced by the addition of CK. Pursuant to the results presented in Figure 5, the size of hyphal  
241 cells treated with CK, Ben (**Fig. S6a**), LatB (**Fig. S6b**), or combinations of Ben/LatB and CK,  
242 was similarly reduced when compared with mock treated cells, demonstrating that CK may have  
243 a similar effect as Ben or LatB on the progression of the cell cycle. Additionally, colony mycelial  
244 area, which was reduced by Ben and LatB in a concentration dependent manner, remained mostly  
245 unaffected by the addition of CK in the background of these drugs (**Fig. S6c,d**).

246

### 247 **Cytokinin reduces yeast growth and endocytosis**

248 Given our observations that CK can affect fundamental cellular processes in fungi, we examined  
249 inhibitory roles for CK in the growth of *Saccharomyces cerevisiae*, a budding yeast, and  
250 *Schizosaccharomyces pombe*, a fission yeast, the growth of which more closely resembles that  
251 of fungal hyphae. Growth curves were generated by measuring OD<sub>600</sub> over time, as previously  
252 described (Laor *et al.*, 2019). We observed that CK inhibits the growth of *S. cerevisiae* (**Fig.**  
253 **9a,b**), and *S. pombe* (**Fig. S7a,b**) in a dose-dependent manner. We found that *S. pombe* was more  
254 strongly inhibited. Interestingly, trans zeatin was previously reported not to affect *S. pombe* cell  
255 division (Suzuki *et al.*, 2001).

256 To examine whether growth inhibition is mediated by endocytosis in yeast, as we found for *Bc*,  
257 we conducted endocytic assays in *S. cerevisiae* (**Fig. 9**) and *S. pombe* (**Fig. S8**). Yeast cultures  
258 were grown overnight, diluted to an OD<sub>600</sub> of 0.2, and grown for a further six hours with or  
259 without CK. Cultures were then stained with FM4-64 (Vásquez-Soto *et al.*, 2015). CK reduces  
260 cell size, internalization of FM4-64, endosome size, and endosome density in both *S. cerevisiae*  
261 (**Fig. 9c-f**) and *S. pombe* (**Fig. S8a-e**)

262 In parallel, the effect of CK on the growth of *S. cerevisiae* endocytic mutants was examined.

263 Genes known to be involved in endocytosis, the absence of which is known not to be lethal, were

264 selected. *S. cerevisiae* knockout strains were generated as described in the methods section.  
265 Mutations in *YPT31*, a Rab/GTPase known to be involved in vesicular trafficking (Jedd *et al.*,  
266 1997), *SSA1*, known to be involved in clathrin vesicle uncoating (Krantz *et al.*, 2013), *VPS1*, a  
267 dynamin-like GTPase known to be required for vacuolar sorting, cytoskeleton organization and  
268 endocytosis (Vater *et al.*, 1992; Ekena *et al.*, 1993) and *SPO14*, a phospholipase D protein  
269 required for sporulation (Rudge *et al.*, 2002), were generated and examined. Three out of the four  
270 generated mutants, *ypt31Δ*, *ssa1Δ*, and *vps1Δ*, exhibited a partial rescue in CK mediated  
271 inhibition (**Fig. 10a-c,e,f**), growing significantly better in the presence of 300 and 500 μM 6-  
272 BAP than the wild type (WT) strain. The *spo14Δ* mutation did not rescue CK-mediated growth  
273 inhibition (**Fig. 10d-f**).

274

## 275 Discussion

276 As reported previously by us and others, and as shown here (**Fig. 1**), CK promotes fungal disease  
277 resistance in plants (Choi *et al.*, 2010; Gupta *et al.*, 2020b). Direct effects of CK on fungal growth  
278 and development have not been investigated in depth in plant-free systems, and although a few  
279 studies have discussed some effects of CK on fungal pathogen growth (Babosha, 2009; Sharma  
280 *et al.*, 2010), no mechanisms for CK antifungal activity have yet been reported. The present study  
281 was performed to examine the direct inhibitory effect of CK on different classes of fungal  
282 phytopathogens. We focused our efforts on three pathogens, *Bc*, *Sr* and *Fol*, with varied lifestyles  
283 and infection modes.

284 We found that CK treatment strongly inhibits *Bc* and *Sr*, and inhibits *Fol* more weakly (**Fig. 1d-**  
285 **j**). It has been demonstrated that pathogenic fungi of the *Fusarium* species complex are able to  
286 produce CKs endogenously, which might be the reason for its tolerance towards exogenous CK  
287 (Vrabka *et al.*, 2018; Sørensen *et al.*, 2018). Interestingly, varying levels of inhibitory activity  
288 were observed for CK in many phytopathogenic fungi (**Fig. S2**).

289 Examination of possible effects of CK on *Bc* development revealed that CK attenuates *Botrytis*  
290 sporulation, spore germination and germ tube elongation (**Fig. 2**), with differential effects of the  
291 CK concentration on different processes. Interestingly, genes involved in the regulation of  
292 growth, conidiation, germination, virulence, and pathogenicity in *Bc*, were strongly inhibited by  
293 CK treatment (**Fig. 3**). Several genes previously found to be involved in plant infection processes  
294 and defined as essential determinants for *Bc* pathogenicity (Zheng *et al.*, 2000; Valette-Collet *et*  
295 *al.*, 2003; Gourgues *et al.*, 2004; Brito *et al.*, 2006; Schumacher *et al.*, 2008; Aguayo *et al.*, 2011;  
296 Frías *et al.*, 2019) were found to be significantly downregulated upon CK treatment (Figure 3c).  
297 This suggests that interference with the expression of virulence genes may also partly contribute  
298 to the inhibitory effects of CK against *Bc*. Inhibition of growth and spore germination together

299 with downregulation of virulence genes in *Bc* could account for plant disease attenuation. This  
300 mechanism could complement the plant induced resistance mechanisms being activated by CK,  
301 which, as reported by us and others (Choi *et al.*, 2010; Argueso *et al.*, 2012; Gupta *et al.*, 2020b),  
302 induces plant immunity even in the absence of a pathogen.

303 Damage in cell membrane integrity in fungi usually leads to the release of nucleic acids and  
304 proteins (Lewis & Papavizas, 1987; Ji *et al.*, 2018; Wang *et al.*, 2020). CK showed no effect on  
305 leakage of nucleic acids and proteins from *Bc* after treatment, and no change was observed in  
306 media conductivity of *Bc* after CK treatment, indicating that cell membrane permeability  
307 remained unchanged. Taken together, these results suggest that CK is not toxic to fungi. CK can  
308 thus be defined as possessing fungistatic, and not fungicidal, activity.

309 To understand the mode of action by which CK inhibited the growth of *Bc*, we conducted  
310 transcriptome profiling on *Bc* with and without CK. RNAseq data suggested that CK  
311 downregulates the cell cycle and cellular cytoskeleton and trafficking processes in *Bc*. Thus, we  
312 examined cell morphology and DNA replication after CK application. CK strongly reduced cell  
313 area, distance between septa, and likely, mitosis (**Fig. 6**). Cell division/septum formation is  
314 dependent on the signals generated during cell extension and growth, and nuclear division.  
315 Reduced cell growth and elongation effected by CK treatment correlates with the lesser number  
316 of septa in the treated cells. Hoechst staining revealed there is less DNA in CK treated cells,  
317 possibly due to inhibition of mitosis. Benomyl treatment, which is known to arrest the cell cycle,  
318 caused decreases in cell sizes that were not further augmented by CK (**Fig. S6**). Taken together,  
319 inhibition of cell division (septa formation) coupled with reduced DNA amounts and activity  
320 similar to benomyl, strongly support the notion that CK is inhibiting mitosis in fungal cells.

321 Also evident from the transcriptomic data was the effect of CK on the cytoskeleton and endocytic  
322 processes. Indeed, we found that CK caused mislocalization of actin at the growing tip of hyphae



323 (**Fig. 7**), likely explaining, at least in part, the reduced hyphal growth observed (**Fig. 1**). CK  
324 inhibited the amount of endocytic vesicles in *Bc* (**Fig. 8**), *S. cerevisiae* (**Fig. 9**), and *S. pombe*  
325 (**Fig. S8**), indicating that it likely has an impact on membrane function and/ or fission of vesicles.  
326 Cell elongation, in particular hyphal elongation, requires continuous addition of new plasma  
327 membrane, proteins, and cell wall material at the hyphal tip. Cellular trafficking and  
328 endo/exocytosis, which depend both on an intact cytoskeleton and on endocytic compartments,  
329 regulate the amount of membrane transferred towards this cellular growth, tightly controlling the  
330 amount of cellular material required for plasma membrane extension (Riquelme *et al.*, 2018).  
331 Inhibition of the cytoskeleton and endocytosis by CK explains the reduced elongation and growth  
332 of *Bc* and yeast cells. Fission yeast may be more reliant on cellular trafficking for rapid cell  
333 elongation than budding yeast, and their growth is more similar to the growth of fungi than that  
334 of budding yeasts, possibly also explaining why fission yeast was more strongly inhibited by CK  
335 than budding yeast.

336 It has been previously suggested that certain classes of fungi possess CK receptors to be able to  
337 "sense plants", a trait posited to have been required for land colonization by fungi (Hérivaux *et*  
338 *al.*, 2017). We and others have previously demonstrated that plants activate CK signaling upon  
339 pathogen attack, and that CK serves as a cue to activate defense responses (Choi *et al.*, 2010;  
340 Argueso *et al.*, 2012; Gupta *et al.*, 2020b). A possibility arising from our work is that when plants  
341 sense the presence of phytopathogenic fungi, an additional reason for the activation of CK  
342 pathways is to promote CK biosynthesis, thereby inhibiting the growth of the potential fungal  
343 attacker. We have shown here that CK inhibits growth in different types of fungi from different  
344 classes (basidiomycetes, ascomycetes) and lifestyles (soilborne, airborne, hemibiotroph,  
345 necrotroph), and yeasts (**Figs. 1, 2, 5, 8, S1, S2**), and cellular trafficking in *Bc*, *S. cerevisiae*, and  
346 *S. pombe* (**Figs. 6, 7, 9, S3**). Chemically or genetically attenuating cellular trafficking in *Bc* (**Fig.**  
347 **7**), or *S. cerevisiae* (**Fig. 10**) respectively, resulted in loss of CK mediated growth inhibition. It

348 would seem that, in employing CK as a fungal pathogen inhibitor, plants have succeeded in  
349 managing to target processes fundamental to growth, such that this inhibition is preserved all the  
350 way to budding yeast.

351

352 In the evolutionary war against plant pathogens, plants appear to have succeeded in creating a 1-  
353 2 mechanism for utilization of CK, previously believed to be only a "developmental" hormone.  
354 1- The plant senses a pathogen and activates its CK response, leading to immunity signaling,  
355 which culminates in increased immunity and systemic pathogen resistance; and 2- the activation  
356 of CK response leads to the generation of increased CK levels, which inhibit the growth and  
357 development of fungal pathogens by targeting their cell cycle and trafficking machinery. Future  
358 work will validate the genetic targets of CK in fungi, and whether this fungistatic activity can be  
359 agriculturally adapted.

360

## 361 **Materials and Methods**

### 362 **Pathogen growth conditions**

363 *Botrytis cinerea* (strain Bcl16), *Sclerotium rolfii* (Liarzi *et al.*, 2020), *Fusarium oxysporum* f.  
364 sp. *lycopersici* (strain 4287) were cultivated on potato dextrose agar (PDA) at  $22 \pm 2$  °C for *B.*  
365 *cinerea*,  $26 \pm 2$  °C for *S. rolfii* and  $28 \pm 2$  °C for *F. oxysporum* for 5-7 days. Pathogen isolates  
366 were kindly gifted by Yigal Elad, David Ezra and Shay Covo.

### 367 **Chemical treatments**

368 6-BAP (6-Benzylaminopurine), zeatin, kinetin, TDZ, (all in 10mM NaOH), adenine (1M HCL),  
369 Benomyl and latrunculinB (DMSO), 1-butanol and 2-butanol, were all obtained from Sigma-  
370 Aldrich, and added to media at indicated concentrations.

### 371 **Cytokinin level measurement**

372 Cytokinin extraction was performed according to (Gupta *et al.*, 2020b). Solvent gradients and  
373 MS-MS parameters are detailed in supplemental Table 1.

### 374 **Plant pathogenesis assays**

375 *Bc* pathogenesis was performed as previously described (Gupta *et al.*, 2020b).

376 *Fol* culture was grown in KNO<sub>3</sub> media (yeast nitrogen base, sucrose, KNO<sub>3</sub> and distilled water)  
377 at 28 °C for 5 days. . Two week old tomato plants were treated with 100 µM 6-BAP (foliar spray)  
378 and inoculated with a spore suspension ( $10^6$  spores ml<sup>-1</sup>) (De Cal *et al.*, 2000) using the root dip  
379 method (Wellman, 1939; Mes *et al.*, 1999), 24 h later. The disease index (DI) was calculated  
380 after three weeks of using a 0–5 scale: 0, no symptoms; 1,  $\leq 2\%$  (healthy plant); 2, 3–30% (slight  
381 disease); 3, 31–60% (moderate disease); 4, 61–90% (severe disease), and 5,  $\geq 91\%$  (dead plant).

382 For *Sr*, tomato plants were soil drenched with 100 µM of 6-BAP or mock (NaOH + Tween 20)  
383 one week prior to infection. After one week, 3-4 sclerotia of *Sr* were placed on the soil, ~2cm  
384 from the plant stem. DI was assessed after 2 weeks.

385 ***B. cinerea* spore germination measurement**

386 *B. cinerea* spores ( $10^6$  spores ml<sup>-1</sup>) were incubated in potato dextrose broth (PDB) containing 0  
387 and 100  $\mu$ M 6-BAP at  $22 \pm 2$  °C for 8 hours. Conidia were washed twice in sterile water (1 ml),  
388 centrifuged at 12,000 rpm for 5 min, and re-suspended in 100  $\mu$ L of sterile water. A 10  $\mu$ L sample  
389 was analyzed under the microscope. The percentage of sporulation, spore germination and the  
390 length of germ tubes were measured using ImageJ software.

391 **Measurement of cellular leakage and electrolytes**

392 *Bc* were treated with 6-BAP (0 and 100  $\mu$ M) in PDB and incubated on a rotary shaker at 180 rpm  
393 for 24h at 22 °C. The mycelia were subsequently centrifuged and the aqueous solutions were  
394 used for measurement of the leakage of nucleic acids and proteins. The absorbance of the  
395 supernatant was measured at 595 nm using UV/VIS spectrophotometer. Leakage of proteins was  
396 quantified according to Bradford (Bradford, 1976). The release of nucleic acids in various  
397 treatments was measured by detecting the optical density at 260 nm. Electrical conductivity was  
398 measured using a conductivity meter (EUTECH instrument con510) after 24 h.

399 ***B. cinerea* qRT-PCR virulence assessment**

400 *Bc* spores were grown in PDB with 0 and 100  $\mu$ M 6-BAP in a rotary shaker at 180 rpm and  $22 \pm$   
401  $2$  °C for 24 hours. RNA was isolated using Tri-reagent (Sigma-Aldrich) according to the  
402 manufacturer's instructions. cDNA was prepared and qRT-PCR was performed as previously  
403 described (Gupta *et al.*, 2020b). The primer sequences for each gene, and primer pair efficiencies,  
404 are detailed in Supplementary Table 2. A geometric mean of the expression values of the three  
405 housekeeping genes: ubiquitin-conjugating enzyme E2 (ubce) (Silva-Moreno *et al.*, 2016), Iron-  
406 transport multicopper oxidase, and Adenosine deaminase (Llanos *et al.*, 2015) was used for  
407 normalization of gene expression levels. Relative gene expression levels were calculated using  
408 the  $2^{-\Delta\Delta C_t}$  method (Pfaffl, 2001).

## 409 **RNA extraction, quality control and RNA-sequencing**

410 Total RNA was extracted from liquid *B. cinerea* cultures grown for two days in 1/2 PDB with  
411 the addition of tobacco seedlings 5 days post germination (150 seedlings/ 50 mL media), mock  
412 or supplemented with 25uM 6BAP, 50 mg fungal mass per sample, using the Norgen total RNA  
413 purification kit (Norgen Biotek corp.) according to the manufacturer's instructions. RNA yield  
414 and purity was measured by Nanodrop (ND-1000 Spectrophotometer, Wilmington, USA), and  
415 validated by Bioanalyzer 2200 TapeStation (Agilent Technologies, California, USA). cDNA  
416 libraries with multiplexing barcodes were prepared using the TrueSeq RNA kit (Illumina, San  
417 Diego, CA, USA). Libraries were evaluated with Qbit and TapeStation (Agilent Technologies,  
418 California, USA). Pooled libraries of the 6 samples were sequenced on one lane of an Illumina  
419 HiSeq 2500 instrument using a 60-bp single-end RNA-Seq protocol, to obtain ~20 million reads  
420 per sample. Sequencing was performed at the Weizmann Institute of Science, Israel.

## 421 **Transcriptome analysis**

422 Raw-reads were subjected to a filtering and cleaning procedure. The Trimmomatic tool was used  
423 to filter out adapter sequences, remove low quality sequences by scanning a 4-base wide sliding  
424 window, cutting when the average quality per base drops below <15 and finally, removal of reads  
425 shorter than 36 bases (Bolger *et al.*, 2014). Clean reads were mapped to the reference genomes  
426 of *B. cinerea* B05.10 (assembly accession GCF\_000143535.2) (Staats & van Kan, 2012) using  
427 STAR software (Dobin *et al.*, 2013). Gene abundance estimation was performed using Cufflinks  
428 version 2.2 (Trapnell *et al.*, 2012) combined with gene annotations from genbank. Heatmap  
429 visualization was performed using R Bioconductor (Gentleman *et al.*, 2004). Gene expression  
430 values were computed as FPKM. Differential expression analysis was completed using the  
431 DESeq2 R package (Love *et al.*, 2014). Genes with an adjusted p-value of no more than 0.05 and  
432 log2FC greater than 1 or lesser than -1 were considered differentially expressed. PCA was

433 calculated using the R function `prcomp`. We submitted the raw sequencing data generated in this  
434 study to NCBI under bioproject accession number PRJNA718329.

435 The gene sequences were used as a query term for a search of the NCBI non-redundant (nr)  
436 protein database that was carried out with the DIAMOND program (Buchfink *et al.*, 2014). The  
437 search results were imported into Blast2GO version 4.0 (Conesa *et al.*, 2005) for gene ontology  
438 (GO) assignments. Gene ontology enrichment analysis was carried out using Blast2GO program  
439 based on Fisher's Exact Test with multiple testing correction of false discovery rate (FDR).  
440 KOBAS 3.0 tool (<http://kobas.cbi.pku.edu.cn/kobas3/?t=1>) (Xie *et al.*, 2011) was used to detect  
441 the statistical enrichment of differential expression genes in KEGG pathway and Gene Ontology  
442 (GO).

#### 443 **Cell elongation and DNA content**

444 *Bc* spores were cultured in PDB with or without 6-BAP (100  $\mu$ M) at 22 °C for 8 (septa counting  
445 in individual hyphae) or 16 h. The cells were then collected and stained with 1 g l<sup>-1</sup> calcofluor  
446 white M2R at room temperature for 15 min, or 15  $\mu$ g ml<sup>-1</sup> Hoechst 33342 (Sigma-Aldrich) in the  
447 dark for 1 h in a humid chamber at room temperature (Dub *et al.*, 2013).

448 Nuclei and septa were visualized with an Olympus 398 IX 81 confocal microscope (Fluoview  
449 500) equipped with a 60 $\times$  1.0 NA PlanApo water immersion objective. Images were acquired  
450 using a 399 nm excitation laser (1% power), with emission collected in the range 385-420 nm.  
451 Images were analyzed using Fiji-ImageJ. Cell size and length (septal distance) were measured  
452 using the area measurement tool. Septa were counted using the counter tool. DNA staining was  
453 assessed using mean intensity measurement.

#### 454 ***B. cinerea* transformation**

455 We used the plasmid pNDH-OLGG (Schumacher, 2012) to generate *B. cinerea* expressing  
456 lifeact-GFP. The transformation cassette was amplified using primers GA 34F/34R

457 (Supplementary Table 4). We transformed *B. cinerea* using PEG mediated transformation.  
458 0.125% lysing enzyme from *Trichoderma harzianum* (Sigma–Aldrich, Germany) was used for  
459 protoplast generation. Following transformation, protoplasts were plated on SH medium  
460 (sucrose, Tris-Cl, (NH<sub>4</sub>)<sub>2</sub>HPO<sub>4</sub> and 35µg/ ml hygromycin B). Colonies that grew after 2 days  
461 were transferred to PDA-hygromycin, and conidia were re-spread on selection plates to obtain a  
462 monoconidial culture. Transformants were visualized under a confocal microscope and screened  
463 with primers GA 44F/44R and GA 31F/31R (Supplementary Table 4). Confirmed transformants  
464 were stored at 80°C and used for further experiments. Confocal microscopy images were  
465 acquired using an Olympus 398 IX 81 confocal microscope (Fluoview 500) equipped with a 60×  
466 1.0 NA PlanApo water immersion objective. eGFP images were acquired using a 488 nm  
467 excitation laser (1% power), with emission collected in the range 488-509 nm. Corrected total  
468 fluorescence was quantified using ImageJ.

#### 469 ***B. cinerea* endocytosis**

470 *Bc* hyphae were grown in PDB with or without 6-BAP (100nM, 100 µM), Benomyl (sigma, cat  
471 no. 17804-35-2), or LatrunculinB (sigma, cat no. 76343-94-7) for 16 h at 22 °C, after which the  
472 cells were collected and stained with 5 µM FM4-64 on a glass coverslip. We acquired confocal  
473 microscopy images using a Zeiss LSM780 confocal microscope equipped with a 63×/1.15 Corr  
474 Objective. FM-4-64 images were acquired with a 514 nm excitation laser (4% power), with the  
475 emission collected in the range of 592–768 nm. Images of 8 bits and 1024 × 1024 pixels were  
476 acquired using a pixel dwell time of 1.27, pixel averaging of 4, and pinhole of 1 airy unit (1.3  
477 µM). Image analysis (18-24 images per treatment collected in three independent experiments)  
478 was conducted with Fiji-ImageJ using the raw images and the 3D object counter tool and  
479 measurement analysis tool (Schindelin *et al.*, 2012). Endosome density and size were calculated  
480 automatically by the software tool considering 1.3 µM depth, based on single optical sections.

#### 481 **Budding (*Saccharomyces cerevisiae*) and fission (*Schizosaccharomyces pombe*) yeast growth**

482 Wild-type haploid yeast strains were grown over night at 30°C. *S. cerevisiae* cells were grown in  
483 synthetic defined (SD) medium and *S. pombe* cells were grown in Edinburgh minimal medium  
484 (EMM), without (mock) or with the addition of indicated concentrations of CK (6-BAP). *S.*  
485 *cerevisiae* and *S. pombe* were diluted to an OD<sub>600</sub> of 0.01. 200 µL of cells were plated in 96 well  
486 plates and incubated at 30°C for 25h (*S. cerevisiae*) or 45h (*S. pombe*), with continuous shaking.  
487 OD<sub>600</sub> was measured using a Tecan™ SPARK 10M plate reader. Experiment was repeated three  
488 times with similar results. WT strains of *S. cerevisiae* and *S. pombe* were kind gifts from Martin  
489 Kupiec and Ronit Weisman.

#### 490 **Budding (*S. cerevisiae*) and fission (*S. pombe*) yeast endocytosis**

491 *Saccharomyces cerevisiae* was grown overnight in YPD media, then the culture was diluted  
492 (OD<sub>600</sub> = 0.2) and incubated for 6 hours in YPD (mock) or YPD supplemented with 300 µM 6-  
493 BAP. *Saccharomyces pombe* was grown overnight in YE. The cultures were then diluted (OD<sub>600</sub>  
494 = 0.2) and incubated for 6 hours in YE media (mock) or media supplemented with 100 µM 6-  
495 BAP. Cell cultures were collected by centrifugation at 5,000 rpm for 4 minutes, and re-suspended  
496 in fresh growth medium. FM4-64 staining was performed as described (Vásquez-Soto *et al.*,  
497 2015). Cells were incubated with 24 µM FM4-64 (Invitrogen) for 30 min at 4°C. Subsequently,  
498 the FM4-64 containing medium was replaced with fresh medium, and cultures was incubated for  
499 15 minutes at 28°C. To observe FM4-64 distribution, 5 µl of the suspensions were placed on a  
500 slide and live confocal imaging was performed. Confocal microscopy images were acquired  
501 using a Zeiss LSM780 confocal microscope equipped with Objective LD C-Apochromat  
502 63×/1.15 Corr. Acquisition settings were designed using an excitation laser wavelength of 514  
503 nm (4% power). The emission was then collected in the range of 592–768 nm. Images of 8 bits  
504 and 1024 × 1024 were acquired using a pixel dwell time of 1.27, pixel averaging of 4 and pinhole  
505 of 1 airy unit. Bright field was acquired using the T-PMT (transmitted light detector). Image  
506 analysis was performed using Fiji-ImageJ with the raw images (Schindelin *et al.*, 2012),



507 endosome count and size measurements were performed with the 3D Object counter tool and  
508 pixel intensity was measured using the measurement analysis tool.

### 509 **Construction of budding yeast mutant strains**

510 The *YPT31*, *SSA1*, *VPS1* and *SPO14* genes were disrupted in wild-type yeast strain (BY4741)  
511 via homologous recombination using PCR fragments amplified from the plasmid pFA6a-  
512 KanMX6 as a template with suitable primers. Gene replacement was validated by PCR with  
513 suitable primers. Primer sequences are provided in Supplemental Table 3.

### 514 **Data analysis**

515 All data is presented as the average  $\pm$ SEM. We analyzed the statistical significance of differences  
516 between two groups using a two-tailed t-test, with additional post hoc correction where  
517 appropriate, such as FDR calculation with Holm-Sidak correction, and Welch's correction for t-  
518 tests between samples with unequal variance. We analyzed the statistical significance of  
519 differences among three or more groups using analysis of variance (ANOVA). Regular ANOVA  
520 was used for groups with equal variances, and Welch's ANOVA for groups with unequal  
521 variances. Significance in differences between the means of different samples in a group of 3 or  
522 more samples was assessed using a post-hoc test. The Tukey post-hoc test was used for samples  
523 with equal variances, when the mean of each sample was compared to the mean of every other  
524 sample. The Bonferroni post-hoc test was used for samples with equal variances, when the mean  
525 of each sample was compared to the mean of a control sample. The Dunnett post-hoc test was  
526 used for samples with unequal variances. Statistical analyses were conducted using Prism8<sup>TM</sup>.

527

### 528 **Acknowledgements**

529 The authors would like to thank Yigal Elad for the *B. cinerea* strain (Bcl-16), Shay Covo for the  
530 *F. oxysporum* f. sp. *lycopersici* strain (4287), David Ezra for gifting various fungal pathogen  
531 isolates, and Martin Kupiec and Ronit Weisman for WT strains of *S. cerevisiae* and *S. pombe*.  
532 This work was supported by the Israel Science Foundation grant No. 1759/20 to MB. GA is  
533 supported by the Indo-China ARO Postdoctoral Fellowship Program. MB thanks members of the  
534 Bar group for continuous discussion and support.

### 535 **Author contributions**

536 Conceptualization: MB, RG. Design: RG, LP, GA, DL, TY, MB. Methodology &  
537 experimentation: RG, LP, GA, DL, NK. Analysis: RG, LP, GA, DL, NS, UG, MB. Manuscript:  
538 RG, LP, GA, DL, UG, MB.

539 **The authors declare no competing interest.**

### 540 **Data availability statement**

541 The authors declare that the data supporting the findings of this study are available within the  
542 paper and its supplementary information files. Raw data is available from the corresponding  
543 author upon reasonable request.

## References

- 544 **Aguayo C, Riquelme J, Valenzuela PDT, Hahn M, Silva Moreno E. 2011.** Bchx  
545 virulence gene of *Botrytis cinerea*: characterization and functional analysis. *Journal of*  
546 *General Plant Pathology* **77**: 230–238.
- 547 **Argueso CT, Ferreira FJ, Epple P, To JPC, Hutchison CE, Schaller GE, Dangl JL,**  
548 **Kieber JJ. 2012.** Two-component elements mediate interactions between cytokinin and  
549 salicylic acid in plant immunity. *PLoS Genetics* **8**.
- 550 **Arnold GRW. 2008.** Farr, D. F.; Bills, G. F.; Chamuris, G. P.; Rossman, A. Y., Fungi on  
551 Plants and Plant Products in the United States. VIII, 1252 S. The American  
552 Phytopathological Society (APS) Press, St. Paul (Minnesota), 1989. ISBN 0-89054-099-3.  
553 *Feddes Repertorium* **101**: 340–340.
- 554 **Babosha A V. 2009.** Regulation of resistance and susceptibility in wheat-powdery mildew  
555 pathosystem with exogenous cytokinins. *Journal of Plant Physiology* **166**: 1892–1903.
- 556 **Ballaré CL. 2011.** Jasmonate-induced defenses: a tale of intelligence, collaborators and  
557 rascals. *Trends in Plant Science* **16**: 249–257.
- 558 **Bartnicki-Garcia S. 2002.** Hyphal Tip Growth Outstanding Questions. *Published in*  
559 *“Molecular Biology of Fungal Development”* (H. D. Osiewacz, ed.): 29–58.
- 560 **Berepiki A, Lichius A, Read ND. 2011.** Actin organization and dynamics in filamentous  
561 fungi. *Nature Reviews Microbiology* **9**: 876–887.
- 562 **Bolger AM, Lohse M, Usadel B. 2014.** Trimmomatic: A flexible trimmer for Illumina  
563 sequence data. *Bioinformatics* **30**: 2114–2120.
- 564 **Boucrot E, Saffarian S, Massol R, Kirchhausen T, Ehrlich M. 2006.** Role of lipids and  
565 actin in the formation of clathrin-coated pits. *Experimental cell research* **312**: 4036–48.
- 566 **Bradford MM. 1976.** A rapid and sensitive method for the quantitation of microgram  
567 quantities of protein utilizing the principle of protein-dye binding. *Analytical Biochemistry*  
568 **72**: 248–254.
- 569 **Brito N, Espino JJ, González C. 2006.** The endo-beta-1,4-xylanase xyn11A is required for  
570 virulence in *Botrytis cinerea*. *Molecular plant-microbe interactions : MPMI* **19**: 25–32.
- 571 **Buchfink B, Xie C, Huson DH. 2014.** Fast and sensitive protein alignment using

- 572 DIAMOND. *Nature Methods* **12**: 59–60.
- 573 **De Cal A, Garcia-Lepe R, Melgarejo P. 2000.** Induced Resistance by *Penicillium*  
574 *oxalicum* Against *Fusarium oxysporum* f. sp. *lycopersici*: Histological Studies of Infected  
575 and Induced Tomato Stems. *Am Phytopath Society*.
- 576 **Choi J, Choi D, Lee S, Ryu C-M, Hwang I. 2011.** Cytokinins and plant immunity: old  
577 foes or new friends? *Trends in Plant Science* **16**: 388–394.
- 578 **Choi J, Huh SU, Kojima M, Sakakibara H, Paek K-HH, Hwang I. 2010.** The cytokinin-  
579 activated transcription factor ARR2 promotes plant immunity via TGA3/NPR1-dependent  
580 salicylic acid signaling in arabidopsis. *Developmental Cell* **19**: 284–295.
- 581 **Conesa A, Götz S, García-Gómez JM, Terol J, Talón M, Robles M. 2005.** Blast2GO: A  
582 universal tool for annotation, visualization and analysis in functional genomics research.  
583 *Bioinformatics* **21**: 3674–3676.
- 584 **Dean R, van Kan J, Pretorius Z, Hammond-Kosack K, Di pietro A, Spanu P, Redd J,**  
585 **Dickman M, Kahmann R, Ellis J, et al. 2012.** The Top 10 fungal pathogens in molecular  
586 plant pathology. *Molecular Plant Pathology* **13**: 414–430.
- 587 **Dobin A, Davis CA, Schlesinger F, Drenkow J, Zaleski C, Jha S, Batut P, Chaisson M,**  
588 **Gingeras TR. 2013.** STAR: Ultrafast universal RNA-seq aligner. *Bioinformatics* **29**: 15–  
589 21.
- 590 **Dub AM, Kokkelink L, Tudzynski B, Tudzynski P, Sharon A. 2013.** Involvement of  
591 *Botrytis cinerea* small GTPases BcRAS1 and BcRAC in differentiation, virulence, and the  
592 cell cycle. *Eukaryotic Cell* **12**: 1609–1618.
- 593 **Ekena K, Vater CA, Raymond CK, Stevens TH. 1993.** The VPS1 protein is a dynamin-  
594 like GTPase required for sorting proteins to the yeast vacuole. *Ciba Foundation symposium*  
595 **176**.
- 596 **Fillinger S, Elad Y. 2016.** *Botrytis -- the fungus, the pathogen and its management in*  
597 *agricultural systems*.
- 598 **Fischer-Parton S, Parton RM, Hickey PC, Dijksterhuis J, Atkinson HA, Read ND.**  
599 **2000.** Confocal microscopy of FM4-64 as a tool for analysing endocytosis and vesicle  
600 trafficking in living fungal hyphae. *Journal of Microscopy* **198**: 246–259.

- 601 **Frías M, González M, González C, Brito N. 2019.** A 25-Residue Peptide From *Botrytis*  
602 *cinerea* Xylanase BcXyn11A Elicits Plant Defenses. *Frontiers in Plant Science* **10**: 474.
- 603 **Gentleman RC, Carey VJ, Bates DM, Bolstad B, Dettling M, Dudoit S, Ellis B, Gautier**  
604 **L, Ge Y, Gentry J, et al. 2004.** Bioconductor: open software development for  
605 computational biology and bioinformatics. *Genome biology* **5**.
- 606 **Ghanem ME, Albacete A, Martínez-Andújar C, Acosta M, Romero-Aranda R, Dodd**  
607 **IC, Lutts S, Pérez-Alfocea F. 2008.** Hormonal changes during salinity-induced leaf  
608 senescence in tomato (*Solanum lycopersicum* L.). *Journal of Experimental Botany* **59**:  
609 3039–3050.
- 610 **Gomes CJ, Harman MW, Centuori SM, Wolgemuth CW, Martinez JD. 2018.**  
611 Measuring DNA content in live cells by fluorescence microscopy. *Cell Division* **13**: 6.
- 612 **Gourgues M, Brunet-Simon A, Lebrun M-H, Levis C. 2004.** The tetraspanin BcPls1 is  
613 required for appressorium-mediated penetration of *Botrytis cinerea* into host plant leaves.  
614 *Molecular microbiology* **51**: 619–29.
- 615 **Greene EM. 1980.** Cytokinin production by microorganisms. *The Botanical Review* **46**:  
616 25–74.
- 617 **Grosskinsky DK, Naseem M, Abdelmohsen UR, Plickert N, Engelke T, Griebel T,**  
618 **Zeier J, Novak O, Strnad M, Pfeifhofer H, et al. 2011.** Cytokinins Mediate Resistance  
619 against *Pseudomonas syringae* in Tobacco through Increased Antimicrobial Phytoalexin  
620 Synthesis Independent of Salicylic Acid Signaling. *Plant Physiology* **157**: 815–830.
- 621 **Gupta R, Leibman-Markus M, Pizarro L, Bar M. 2020a.** Cytokinin induces bacterial  
622 pathogen resistance in tomato. *Plant Pathology* **In press**.
- 623 **Gupta R, Pizarro L, Leibman-Markus M, Marash I, Bar M. 2020b.** Cytokinin response  
624 induces immunity and fungal pathogen resistance, and modulates trafficking of the PRR  
625 LeEIX2 in tomato. *Molecular plant pathology*: 10.1111/mpp.12978.
- 626 **Hérivaux A, Dugé de Bernonville T, Roux C, Clastre M, Courdavault V, Gastebois A,**  
627 **Bouchara J-P, James TY, Latgé J-P, Martin F, et al. 2017.** The Identification of  
628 Phytohormone Receptor Homologs in Early Diverging Fungi Suggests a Role for Plant  
629 Sensing in Land Colonization by Fungi. *mBio* **8**.
- 630 **Jameson PE. 2000.** Cytokinins and auxins in plant-pathogen interactions – An overview.

- 631 *Plant Growth Regulation* **32**: 369–380.
- 632 **Jedd G, Mulholland J, Segev N. 1997.** Two new Ypt GTPases are required for exit from  
633 the yeast trans-Golgi compartment. *The Journal of cell biology* **137**: 563–80.
- 634 **Ji D, Chen T, Ma D, Liu J, Xu Y, Tian S. 2018.** Inhibitory effects of methyl thujate on  
635 mycelial growth of *Botrytis cinerea* and possible mechanisms. *Postharvest Biology and*  
636 *Technology* **142**: 46–54.
- 637 **Jia Y, Li W. 2018.** Phospholipase D antagonist 1-butanol inhibited the mobilization of  
638 triacylglycerol during seed germination in *Arabidopsis*. *Plant diversity* **40**: 292–298.
- 639 **Keshishian EA, Rashotte AM. 2015.** Plant cytokinin signalling. *Essays in biochemistry*  
640 **58**: 13–27.
- 641 **Ketelaar T, Meijer HJG, Spiekerman M, Weide R, Govers F. 2012.** Effects of  
642 latrunculin B on the actin cytoskeleton and hyphal growth in *Phytophthora infestans*.  
643 *Fungal Genetics and Biology* **49**: 1014–1022.
- 644 **Krantz KC, Puchalla J, Thapa R, Kobayashi C, Bisher M, Viehweg J, Carr CM, Rye**  
645 **HS. 2013.** Clathrin coat disassembly by the yeast Hsc70/Ssa1p and auxilin/Swa2p proteins  
646 observed by single-particle burst analysis spectroscopy. *The Journal of biological chemistry*  
647 **288**: 26721–30.
- 648 **Laor D, Sade D, Shaham-Niv S, Zaguri D, Gartner M, Basavalingappa V, Raveh A,**  
649 **Pichinuk E, Engel H, Iwasaki K, et al. 2019.** Fibril formation and therapeutic targeting of  
650 amyloid-like structures in a yeast model of adenine accumulation. *Nature Communications*  
651 **10**: 1–11.
- 652 **Lewis J, Papavizas G. 1987.** Permeability changes in hyphae of *Rhizoctonia solani*  
653 induced by germling preparations of *Trichoderma* and *Gliocladium*. *Physiology and*  
654 *Biochemistry* **77**: 699–703.
- 655 **Li X, Gao M, Han X, Tao S, Zheng D, Cheng Y, Yu R, Han G, Schmidt M, Han L.**  
656 **2012.** Disruption of the phospholipase D gene attenuates the virulence of *Aspergillus*  
657 *fumigatus*. *Infection and immunity* **80**: 429–40.
- 658 **Liarzi O, Benichis M, Gamliel A, Ezra D. 2020.** *trans* -2-Octenal, a single compound of a  
659 fungal origin, controls *Sclerotium rolfisii*, both *in vitro* and in soil. *Pest Management*  
660 *Science* **76**: 2068–2071.

- 661 **Liu Z, Bushnell WR. 1986.** Effects of cytokinins on fungus development and host  
662 response in powdery mildew of barley. *Physiological and Molecular Plant Pathology* **29**:  
663 41–52.
- 664 **Llanos A, François JM, Parrou JL. 2015.** Tracking the best reference genes for RT-qPCR  
665 data normalization in filamentous fungi. *BMC Genomics* **16**: 71.
- 666 **Love MI, Huber W, Anders S. 2014.** Moderated estimation of fold change and dispersion  
667 for RNA-seq data with DESeq2. *Genome Biology* **15**.
- 668 **Marhavý P, Bielach A, Abas L, Abuzeineh A, Duclercq J, Tanaka H, Pařezová M,**  
669 **Petrářek J, Friml J, Kleine-Vehn J, et al. 2011.** Cytokinin Modulates Endocytic  
670 Trafficking of PIN1 Auxin Efflux Carrier to Control Plant Organogenesis. *Developmental*  
671 *Cell* **21**: 796–804.
- 672 **Mes J, Weststeijn E, Herlaar F. 1999.** Biological and Molecular Characterization of  
673 *Fusarium oxysporum* f. sp. *lycopersici* Divides Race 1 Isolates into Separate Virulence  
674 Groups. *Am Phytopath Society*.
- 675 **Mishina GN, Talieva MN, Babosha AV, Serezhkina GV, Andreev LN. 2002.** Influence  
676 of phytohormones on development of conidial inoculum of causative agents of the phlox  
677 and barley powdery mildew | Vliianie fitogormonov na razvitie konidial'nogo inokuliuma  
678 vzbuditelei muchnistoi rosy floksa i iachmenia. *Izvestiia Akademii nauk. Seriia*  
679 *biologicheskaiia / Rossiiskaia akademiia nauk* **29**: 46–52.
- 680 **Mok DW, Mok MC. 2001.** Cytokinin metabolism and action. *Ann. Rev. Plant Physiol.*  
681 *Plant Mol. Biol.* **52**: 89–118.
- 682 **Momany M, Hamer JE. 1997.** Relationship of actin, microtubules, and crosswall synthesis  
683 during septation in *Aspergillus nidulans*. *Cell Motility and the Cytoskeleton* **38**: 373–384.
- 684 **Motes CM, Pechter P, Yoo CM, Wang Y-S, Chapman KD, Blancaflor EB. 2005.**  
685 Differential effects of two phospholipase D inhibitors, 1-butanol and N-acylethanolamine,  
686 on in vivo cytoskeletal organization and Arabidopsis seedling growth. *Protoplasma* **226**:  
687 109–123.
- 688 **Naseem M, Philippi N, Hussain A, Wangorsch G, Ahmed N, Dandekar T, Dandekara**  
689 **T, Dandekar T. 2012.** Integrated systems view on Networking by hormones in Arabidopsis  
690 immunity reveals multiple crosstalk for cytokinin. *The Plant Cell* **24**: 1793–1814.

- 691 **Nieto K, Frankenberger W. 1991.** Microbial production of cytokinins. *Soil biochemistry.*  
692 Volume 6., 191-248. Bollag, J.-M. and G. Stotzky (eds.): *Soil Biochemistry, Vol. 6 (Books*  
693 *in Soils, Plants, and the Environment Series). Zeitschrift für Pflanzenernährung und*  
694 *Bodenkunde* **154**: 74–74.
- 695 **Peterson JR, Mitchison TJ. 2002.** Small molecules, big impact: A history of chemical  
696 inhibitors and the cytoskeleton. *Chemistry and Biology* **9**: 1275–1285.
- 697 **Pfaffl MW. 2001.** A new mathematical model for relative quantification in real-time RT-  
698 PCR. *Nucleic Acids Res* **29**: e45.
- 699 **Riquelme M, Aguirre J, Bartnicki-García S, Braus GH, Feldbrügge M, Fleig U,**  
700 **Hansberg W, Herrera-Estrella A, Kämper J, Kück U, et al. 2018.** Fungal  
701 Morphogenesis, from the Polarized Growth of Hyphae to Complex Reproduction and  
702 Infection Structures. *Microbiology and molecular biology reviews* : *MMBR* **82**.
- 703 **Rudge SA, Zhou C, Engebrecht JA. 2002.** Differential regulation of *Saccharomyces*  
704 *cerevisiae* phospholipase D in sporulation and Sec14-independent secretion. *Genetics* **160**:  
705 1353–1361.
- 706 **Sakakibara H. 2006.** Cytokinins: Activity, Biosynthesis, and Translocation. *Annu Rev*  
707 *Plant Biol.*
- 708 **Schindelin J, Arganda-Carreras I, Frise E, Kaynig V, Longair M, Pietzsch T,**  
709 **Preibisch S, Rueden C, Saalfeld S, Schmid B, et al. 2012.** Fiji: an open-source platform  
710 for biological-image analysis. *Nature Methods* **9**: 676–682.
- 711 **Schumacher J. 2012.** Tools for *Botrytis cinerea*: New expression vectors make the gray  
712 mold fungus more accessible to cell biology approaches. *Fungal Genetics and Biology* **49**:  
713 483–497.
- 714 **Schumacher J, Viaud M, Simon A, Tudzynski B. 2008.** The G $\alpha$  subunit BCG1, the  
715 phospholipase C (BcPLC1) and the calcineurin phosphatase co-ordinately regulate gene  
716 expression in the grey mould fungus *Botrytis cinerea*. *Molecular Microbiology* **67**: 1027–  
717 1050.
- 718 **Sharfman M, Bar M, Ehrlich M, Schuster S, Melech-Bonfil S, Ezer R, Sessa G, Avni**  
719 **A. 2011.** Endosomal signaling of the tomato leucine-rich repeat receptor-like protein  
720 LeEix2. *The Plant Journal* **68**: 413–423.



- 721 **Sharma N, Rahman MH, Liang Y, Kav NN V. 2010.** Cytokinin inhibits the growth of  
722 *Leptosphaeria maculans* and *Alternaria brassicae*. *Canadian Journal of Plant Pathology*  
723 **32**: 306–314.
- 724 **Silva-Moreno E, Brito-Echeverría J, López M, Ríos J, Balic I, Campos-Vargas R,**  
725 **Polanco R. 2016.** Effect of cuticular waxes compounds from table grapes on growth,  
726 germination and gene expression in *Botrytis cinerea*. *World Journal of Microbiology and*  
727 *Biotechnology* **32**: 74.
- 728 **Sørensen JL, Benfield AH, Wollenberg RD, Westphal K, Wimmer R, Nielsen MR,**  
729 **Nielsen KF, Carere J, Covarelli L, Beccari G, et al. 2018.** The cereal pathogen *Fusarium*  
730 *pseudograminearum* produces a new class of active cytokinins during infection. *Molecular*  
731 *Plant Pathology* **19**: 1140–1154.
- 732 **Staats M, van Kan JAL. 2012.** Genome update of *Botrytis cinerea* strains B05.10 and T4.  
733 *Eukaryotic Cell* **11**: 1413–1414.
- 734 **Stravato VM, Buonauro R, Cappelli C. 1999.** First Report of *Fusarium oxysporum* f. sp.  
735 *lycopersici* Race 2 on Tomato in Italy. *Plant Disease* **83**: 967–967.
- 736 **Suzuki T, Miwa K, Ishikawa K, Yamada H, Aiba H, Mizuno T. 2001.** The Arabidopsis  
737 sensor kinase, AHK4, can respond to cytokinin. *Plant Cell Physiol.* **42**: 107–113.
- 738 **Swartzberg D, Kirshner B, Rav-David D, Elad Y, Granot D. 2008.** *Botrytis cinerea*  
739 induces senescence and is inhibited by autoregulated expression of the IPT gene. *European*  
740 *Journal of Plant Pathology* **120**: 289–297.
- 741 **Torres-Ossandón MJ, Vega-Gálvez A, Salas CE, Rubio J, Silva-Moreno E, Castillo L.**  
742 **2019.** Antifungal activity of proteolytic fraction (PIG10) from (*Vasconcellea*  
743 *cundinamarcensis*) latex inhibit cell growth and cell wall integrity in *Botrytis cinerea*.  
744 *International Journal of Food Microbiology* **289**: 7–16.
- 745 **Trapnell C, Roberts A, Goff L, Pertea G, Kim D, Kelley DR, Pimentel H, Salzberg SL,**  
746 **Rinn JL, Pachter L. 2012.** Differential gene and transcript expression analysis of RNA-seq  
747 experiments with TopHat and Cufflinks. *Nature Protocols* **7**: 562–578.
- 748 **Tsahouridou PC, Thanassouloupoulos CC. 2002.** Proliferation of *Trichoderma koningii* in  
749 the tomato rhizosphere and the suppression of damping-off by *Sclerotium rolfsii*. *Soil*  
750 *Biology and Biochemistry* **34**: 767–776.

- 751 **Valette-Collet O, Cimerman A, Reignault P, Levis C, Boccara M. 2003.** Disruption of  
752 *Botrytis cinerea* pectin methylesterase gene *Bcpme1* reduces virulence on several host  
753 plants. *Molecular plant-microbe interactions : MPMI* **16**: 360–7.
- 754 **Vásquez-Soto B, Manríquez N, Cruz-Amaya M, Zouhar J, Raikhel N V, Norambuena**  
755 **L. 2015.** Sortin2 enhances endocytic trafficking towards the vacuole in *Saccharomyces*  
756 *cerevisiae*. *Biological Research* **48**: 39.
- 757 **Vater CA, Raymond CK, Ekena K, Howald-Stevenson I, Stevens TH. 1992.** The VPS1  
758 protein, a homolog of dynamin required for vacuolar protein sorting in *Saccharomyces*  
759 *cerevisiae*, is a GTPase with two functionally separable domains. *Journal of Cell Biology*  
760 **119**: 773–786.
- 761 **Vrabka J, Niehaus E-M, Münsterkötter M, Proctor RH, Brown DW, Novák O, Pěňčík**  
762 **A, Tarkowská D, Hromadová K, Hradilová M, et al. 2018.** Production and Role of  
763 Hormones During Interaction of *Fusarium* Species With Maize (*Zea mays* L.) Seedlings.  
764 *Frontiers in plant science* **9**: 1936.
- 765 **Walker SK, Garrill A.** *Actin microfilaments in fungi*.
- 766 **Walters DR, McRoberts N. 2006.** Plants and biotrophs: a pivotal role for cytokinins?  
767 *Trends in plant science* **11**: 581–6.
- 768 **Wang Y, Liu X, Chen T, Xu Y, Tian S. 2020.** Antifungal effects of hinokitiol on  
769 development of *Botrytis cinerea* in vitro and in vivo. *Postharvest Biology and Technology*  
770 **159**: 111038.
- 771 **Wellman F. 1939.** A technique for studying host resistance and pathogenicity in tomato  
772 *Fusarium* wilt. *Phytopathology*.
- 773 **Werner T, Schmülling T. 2009.** Cytokinin action in plant development. *Current opinion in*  
774 *plant biology* **12**: 527–38.
- 775 **Williamson B, Tudzynski B, Tudzynski P, Van Kan JAL. 2007.** *Botrytis cinerea*: The  
776 cause of grey mould disease. *Molecular Plant Pathology* **8**: 561–580.
- 777 **Xie C, Mao X, Huang J, Ding Y, Wu J, Dong S, Kong L, Gao G, Li CY, Wei L. 2011.**  
778 KOBAS 2.0: A web server for annotation and identification of enriched pathways and  
779 diseases. *Nucleic Acids Research* **39**.

780 **Zheng L, Campbell M, Murphy J, Lam S, Xu JR. 2000.** The BMP1 gene is essential for  
781 pathogenicity in the gray mold fungus *Botrytis cinerea*. *Molecular plant-microbe*  
782 *interactions* : *MPMI* **13**: 724–32.

783 **Žižková E, Dobrev PI, Muhovski Y, Hošek P, Hoyerová K, Haisel D, Procházková D,**  
784 **Lutts S, Motyka V, Hichri I. 2015.** Tomato (*Solanum lycopersicum* L.) SIPT3 and  
785 SIPT4 isopentenyltransferases mediate salt stress response in tomato. *BMC Plant Biology*  
786 **15**: 1–20.

### **Figure legends**

787

788 **Fig. 1. Direct effect of cytokinin on fungal growth and disease.**

789 **(a)-(c)** *S. lycopersicum* cv M82 leaves were treated with 100  $\mu$ M CK (6-BAP; 6-  
790 Benzylaminopurine) and inoculated with indicated pathogens 24 hours later. Plant disease was  
791 quantified as indicated in the material and methods section, disease in the mock treatment was set  
792 to 1. Graphs represent results from 4-6 biological repeats  $\pm$ SE, N>40. Asterisks represent significant  
793 difference among means in a two-tailed t-test, \*\*\*\*p<0.0001, ns-non-significant. All individual  
794 values plotted, purple bar represents mean  $\pm$ SE.

795 **(d)-(i)** *B. cinerea*, *S. rolfisii* and *F. oxysporum* were cultured on potato dextrose agar (PDA) plates  
796 in the presence of 100  $\mu$ M 6-BAP. **(j)** Quantification of results from 4-6 biological repeats  $\pm$ SE,  
797 including adenine (100  $\mu$ M) as a control, N>20. Asterisks (differences between Mock and CK) and  
798 letters (differences between the level of CK growth inhibition in the different fungi) indicate  
799 significance in one-way ANOVA with a Bonferroni post hoc test, \*p<0.05, \*\*p<0.01,  
800 \*\*\*\*p<0.0001, ns=non-significant. **(k)** *B. cinerea* was cultured on potato dextrose agar (PDA) plates  
801 in the presence of 100  $\mu$ M of the indicated CK compound (TDZ=Thidiazuron). Quantification of  
802 results from 3 biological repeats  $\pm$ SE, N=12. Asterisks indicate significance in one-way ANOVA  
803 with a Tukey post hoc test, \*\*\*p<0.001, \*\*\*\*p<0.0001. **(i-k)** Dose response of *B. cinerea*, *S. rolfisii*  
804 and *F. oxysporum* to CK- different concentrations of 6-BAP as indicated. Graphs represent 3  
805 biological repeats  $\pm$ SE, N>6. Letters indicate significance in a one-way ANOVA, \*\*\*\*p<0.0001 in  
806 all cases, with a Tukey post-hoc test. **j-k**: Box-plot displays minimum to maximum values, with  
807 inner quartile ranges indicated by box and outer-quartile ranges by whiskers. Line indicates median,  
808 dot indicates mean.

809

810 **Fig. 2. Cytokinin inhibits *Bc* sporulation and spore germination.**

811 **(a)-(b)** *B. cinerea* was cultured on PDA plates or PDB liquid broth in the presence of 100 nM or 100  
812  $\mu$ M 6-Benzylaminopurine (6-BAP). Spore formation is indicated by dark color **(a)** and quantified in  
813 **(b)**. Spore germination and germ tube elongation are demonstrated in **(c)** with calcofluor staining  
814 (scale bar = 20  $\mu$ M), and quantified in **(d)-(e)**. **(b,d,e)** Quantification of results from 4 biological  
815 repeats  $\pm$ SE,  $N > 25$ . Asterisks or letters indicate significance in one-way ANOVA with a Tukey post  
816 hoc test, \*\*\* $p < 0.005$ , \*\*\*\* $p < 0.001$ . Individual values graphed, blue bar represents mean  $\pm$ SE.

817

818 **Fig. 3. Cytokinin inhibits *B. cinerea* virulence.**

819 **(a)** Infectivity of spores sporulated from mycelia grown with or without cytokinin (CK; 6-  
820 Benzylaminopurine). Spores were harvested in a glucose/potassium media as described in the  
821 materials sections, and diluted to an equal concentration (the CK grown spores were concentrated  
822 as CK grown fungi produce reduced numbers). **(b)** Infectivity of spores grown in rich media and  
823 harvested from the same plate; half the spores were mixed with CK prior to infection. **(c)** *B. cinerea*  
824 was grown in PDB with the addition of 100  $\mu$ M CK (6-BAP) or without (Mock). qRT-PCR was  
825 carried out on the virulence genes *BMP1*, *PME*, *PLS1*, *PLC1*, *PG1*, *hex*, *XynI*, *Xyn10A* and *Xyn11C*.  
826 Mock was set to 1. Gene expression values were normalized to a geometric mean of the expression  
827 of 3 housekeeping genes: Ubiquitin-conjugating enzyme E2, Iron-transport multicopper oxidase,  
828 and Adenosine deaminase. Graph represents 3 biological repeats,  $N = 9$ . **a-b**: individual values  
829 graphed, pink bar represents mean  $\pm$ SE. Results were analyzed for statistical significance using a  
830 two-tailed t-test, \*\*\*\* $p < 0.0001$ ; ns-non-significant. **c**: floating bars, line indicates mean. Results  
831 were analyzed for statistical significance using Welch's Anova with a Dunnett post hoc test, \* $p < 0.05$ ,  
832 \*\* $p < 0.01$ , \*\*\*\* $p < 0.0001$ .

833

834 **Fig. 4. Cytokinin is not toxic to *B. cinerea*.**

835 *B. cinerea* (*Bc*) was cultured in PDB liquid broth, with or without 100  $\mu$ M CK (6-  
836 Benzylaminopurine). After 24 hours, protein leakage **(a)**, nucleic acid leakage **(b)**, and media  
837 conductivity **(c)** were measured. Graphs represent 3 biological repeats  $\pm$ SE,  $N > 6$ . Letters indicate  
838 significance in one-way ANOVA with a Tukey (a) or Bonferroni (b,c) post hoc test; a  $p = ns$ ; b,c  
839  $p < 0.0001$ . Box-plot with 2.5% whiskers; line indicates median, dot indicates mean. No significant  
840 difference between control media containing CK (without *Bc*) or *Bc* with CK was observed in any  
841 of the parameters.

842

843 **Fig. 5. Transcriptomics reveal fungal pathways affected by CK**

844 Analysis of Illumina Hiseq NGS of *Bc* samples Mock treated or CK treated (25  $\mu$ M), 3 biological  
845 repeats each. Gene expression values were computed as FPKM. Differential expression analysis was  
846 completed using the DESeq2 R package. Genes with an adjusted p-value of no more than 0.05 and  
847  $\log_2$ FC greater than 1 or lesser than -1 were considered differentially expressed. **(a)** Principle

848 component analysis (PCA) of 3 biological repeats from each treatment. PCA was calculated using  
849 the R function prcomp. **(b)** Heatmap depicting the clustering of the different samples in terms of  
850 differentially expressed genes. Blue= negatively regulated by CK, red= positively regulated by CK.  
851 Color saturation indicates strength of differential expression. Heatmap visualization was performed  
852 using R Bioconductor. See also Supplemental data 1. **(c-d)** Analysis of statistically enriched  
853 pathways downregulated (c, blue) and upregulated (d, red) by CK. KOBAS 3.0 tool was used to  
854 detect the statistical enrichment of differential expression genes in Kyoto Encyclopedia of Genes  
855 and Genomes (KEGG) pathways and Gene Ontology (GO). Pathways were tested for significant  
856 enrichment using Fisher's exact test, with Benjamini and Hochberg FDR correction. Corrected p-  
857 value was deemed significant at  $p < 0.05$ . See also Supplemental data 2 and 3. In (c-d), the darker the  
858 color the higher the number of DEGs in a pathway, and the bigger the letters, the higher percentage  
859 of the pathway that is differential.

860

### 861 **Fig. 6. Cytokinin reduces *B. cinerea* cell elongation and DNA replication**

862 *B. cinerea* was cultured in PDB liquid broth, with or without 100  $\mu$ M CK (6-Benzylaminopurine).  
863 After 8 **(f)** or 16 hours **(a-e,g)**, growing hyphae were stained with calcofluor **(a,b,d,e,f)** or hoechst  
864 **(c,g)**, and imaged on an Olympus IX 81 confocal laser scanning microscope using a 405nm diode  
865 laser (1% power), under identical imaging conditions. **a-c**: bar=50  $\mu$ M; **b**: bar=20  $\mu$ M. Cell area **(d)**,  
866 distance between septa **(e)**, No. of septa in individual germinated hyphae **(f)** and DNA staining **(g)**  
867 were measured using Fiji-ImageJ. Graphs represent 3-6 biological repeats,  $N > 120$  (d,e),  $N > 30$  (f),  
868  $N = 170$  (g). Statistically significant differences between Mock and CK samples were assessed using  
869 a two-tailed t-test, \*\*\*\* $p < 0.0001$ . Individual values graphed, blue bar represents mean  $\pm$ SE.

870

### 871 **Fig. 7. Cytokinin inhibits the fungal cytoskeleton**

872 **(a)** Cytoskeleton related *B. cinerea* genes found to be differentially regulated in the RNAseq. See  
873 Supplemental data 4 for full list. **(b)** qRT-PCR validation of expression levels of 5 cytoskeleton  
874 related genes upon CK treatment. *B. cinerea* was grown in PDB with the addition of 100  $\mu$ M CK  
875 (6-BAP) or without (Mock). Mock was set to 1. Gene expression values were normalized to a  
876 geometric mean of the expression of 3 housekeeping genes: Ubiquitin-conjugating enzyme E2, Iron-  
877 transport multicopper oxidase, and Adenosine deaminase. Floating bars represent minimum to  
878 maximum values of 3 biological repeats, line represents mean. Asterisks indicate significance in a  
879 two-tailed t-test with Welch's correction, \* $p < 0.05$ ; \*\*\* $p < 0.001$ . **(c-d)** *B. cinerea* was transformed  
880 with lifeactin-GFP. Germinated spores were treated with Mock or CK and grown for 6 h prior to  
881 confocal visualization. **(c)** Representative images, bar=10  $\mu$ M. **(d)** Analysis of corrected total  
882 fluorescence (CTF) of the ratio between life-actin at the tip of the cell and the total cell in Mock and  
883 CK treated cells. Three independent experiments were conducted with a total of 30 images analyzed,  
884  $N > 80$  growing hyphae tips. Asterisks indicate significance in a two-tailed t-test with Welch's  
885 correction, \*\*\*\* $p < 0.0001$ .

886 **Fig. 8. Cytokinin inhibits FM-4-64 endocytosis in growing *B. cinerea* hyphae.**

887 *B. cinerea* (*Bc*) was cultured in PDB liquid broth in the presence of 100 nM or 100  $\mu$ M CK (6-  
888 Benzylaminopurine) for 16 hours. **(a)** FM-4-64 endocytic vesicles in *Bc* hyphae. **(b)** quantification  
889 of the amount of endocytic vesicles; **(c)** quantification of the average size of vesicles. Measurements  
890 were done using the counting tool of Fiji. Quantification of results from 7 biological repeats. **b:**  
891  $N > 45$ , box-plot with all values displayed, box indicates inner-quartile ranges with line indicating  
892 median, whiskers indicate outer-quartile ranges. **c:**  $N > 450$ , all values displayed, line indicates  
893 median  $\pm$ SE. Asterisks indicate significance in one-way ANOVA with a Tukey post hoc test,  
894 \* $p < 0.05$ ; \*\* $p < 0.01$ ; \*\*\*\* $p < 0.0001$ ; ns- non-significant.

895

896 **Fig. 9. Cytokinin inhibits growth and endocytosis in budding yeast.**

897 **(a)** Wild-type *Saccharomyces cerevisiae* were grown over night at 30°C in minimal synthetic  
898 defined medium, treated with either 10  $\mu$ M NaOH (Mock) or with the addition of indicated  
899 concentrations of CK (6-Benzylaminopurine). Cells were incubated at 30°C for 25h, with continuous  
900 shaking. Average growth per time point for 3 experiments is presented,  $N = 9$ . Blue color represents  
901 statistical significance from Mock treatment in a two-tailed t-test with Holm-Sidak correction,  
902  $p < 0.05$ . **(b)** Average growth (OD) at mid log phase (15h) in three independent experiments. Letters  
903 indicate significance in a one-way ANOVA with a post hoc Tukey test;  $p < 0.0001$ . All points  
904 displayed; red lines indicate mean  $\pm$ SE.

905 **(c-f)** *S. cerevisiae* yeast cells were grown overnight at 30°C in YPD medium, diluted ( $OD_{600} = 0.2$ )  
906 and incubated for 6 hours in YPD media (Mock) or media supplemented with 300  $\mu$ M CK (6-  
907 Benzylaminopurine). Cells were incubated with 24  $\mu$ M FM4-64 (Invitrogen) at 4°C for 30 min.  
908 Subsequently, the FM4-64 containing medium was replaced with fresh medium and cultures was  
909 incubated at 28°C for 15 minutes. Confocal microscopy images were acquired using a Zeiss  
910 LSM780 confocal microscope. **(c)** cell size; **(d)** total internalized FM4-64 per cell represented by  
911 pixel intensity; **(e)** endosome density. **(f)** Representative images, Bar, 10  $\mu$ m. Box-plots with all  
912 values displayed; line indicates median. **c-e:**  $N > 160$ . Image analysis was performed using Fiji-  
913 ImageJ with raw images collected from 3 independent biological experiments. Endosome count  
914 measurements were done with the 3D Object counter tool and pixel intensity was measured using  
915 the measurement analysis tool. Asterisks represent statistical significance in a two-tailed t-test with  
916 a Mann-Whitney post hoc test, \* $p < 0.05$ , \*\*\*\* $p < 0.0001$ .

917

918 **Fig. 10. Cytokinin mediated growth inhibition is partially rescued in budding yeast endocytic**  
919 **mutants.**

920 *S. cerevisiae* Wild-type (WT, a-f), *ypt31 $\Delta$*  **(a,e,f)**, *ssa1 $\Delta$*  **(b,e,f)**, *vps1 $\Delta$*  **(c,e,f)** and *spol1 $\Delta$*  **(d,e,f)**  
921 were grown over night at 30°C for 25 h, in minimal synthetic defined medium, treated with either  
922 10  $\mu$ M NaOH (Mock) or with the addition of 300  $\mu$ M **(a-e)** or 500  $\mu$ M **(f)** CK (6-  
923 Benzylaminopurine).

924 **(a-d)** Average growth per time point for three experiments is presented, N=9. Asterisks indicate  
925 statistical significance of each mutant with CK compared to WT with CK, in a two-tailed t-test with  
926 Holm-Sidak correction, \* $p < 0.05$ , \*\* $p < 0.01$ , \*\*\* $p < 0.001$ , \*\*\*\* $p < 0.0001$ .  
927 **(e-f)** Percentage of growth inhibition of each strain with 300 $\mu$ M CK (e) and 500  $\mu$ M CK (f) as  
928 compared to mock treatment, at 13 h, in three independent experiments, N=9. Boxplots are shown  
929 with inter-quartile-ranges (box), medians (black line in box), and outer quartile whiskers, minimum  
930 to maximum values. Asterisks indicate significance in a one-way ANOVA with a post hoc Tukey  
931 test; \* $p < 0.05$ ; \*\* $p < 0.01$ ; \*\*\* $p < 0.001$ ; ns (non-significant).

932

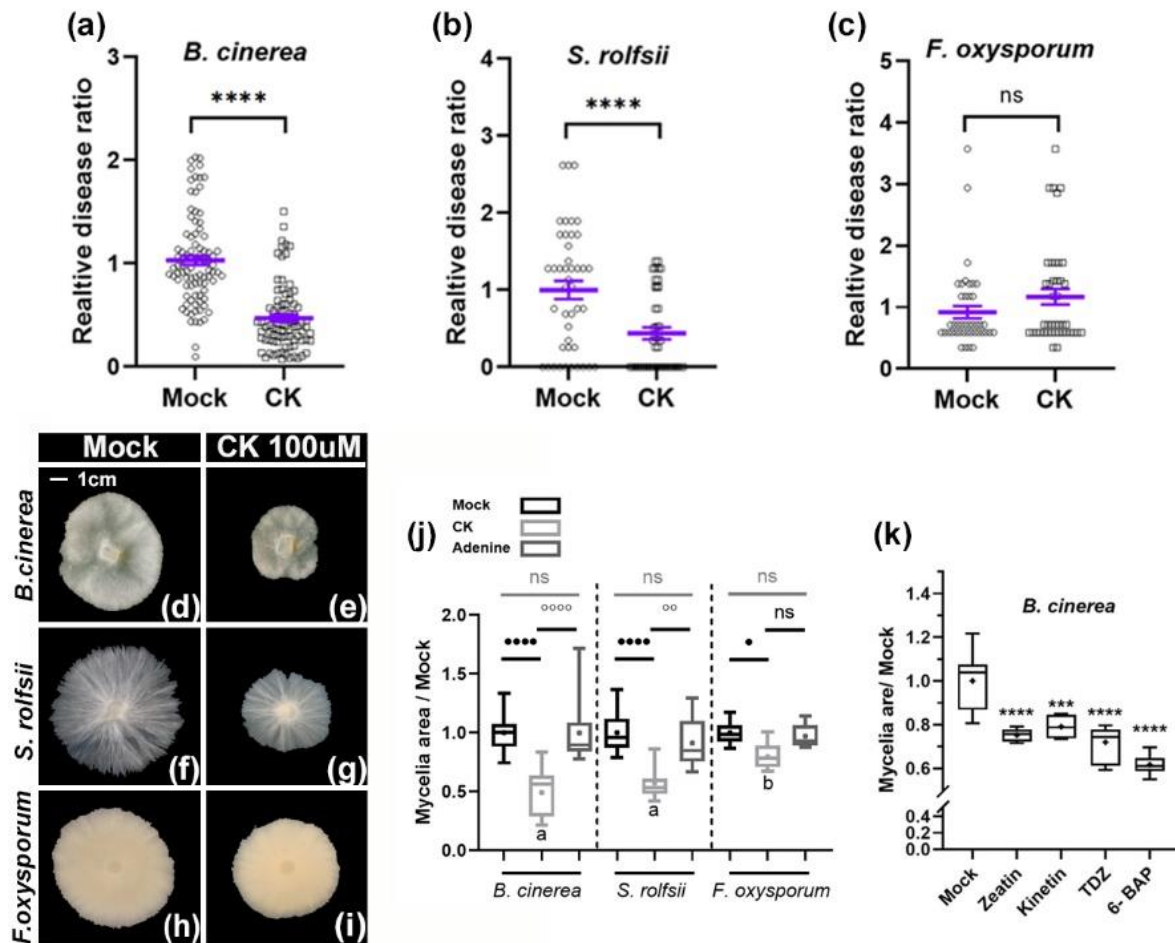

**Fig. 1. Direct effect of cytokinin on fungal growth and disease.**

(a)-(c) *S. lycopersicum* cv M82 leaves were treated with 100 µM CK (6-BAP; 6-Benzylaminopurine) and inoculated with indicated pathogens 24 hours later. Plant disease was quantified as indicated in the material and methods section, disease in the mock treatment was set to 1. Graphs represent results from 4-6 biological repeats  $\pm$ SE, N>40. Asterisks represent significant difference among means in a two-tailed t-test, \*\*\*\*p<0.0001, ns-non-significant. All individual values plotted, purple bar represents mean  $\pm$ SE.

(d)-(i) *B. cinerea*, *S. rolfsii* and *F. oxysporum* were cultured on potato dextrose agar (PDA) plates in the presence of 100 µM 6-BAP. (j) Quantification of results from 4-6 biological repeats  $\pm$ SE, including adenine (100 µM) as a control, N>20. Asterisks (differences between Mock and CK) and letters (differences between the level of CK growth inhibition in the different fungi) indicate significance in one-way ANOVA with a Bonferroni post hoc test, \*p<0.05, \*\*p<0.01, \*\*\*\*p<0.0001, ns=non-significant. (k) *B. cinerea* was cultured on potato dextrose agar (PDA) plates in the presence of 100 µM of the indicated CK compound (TDZ=Thidiazuron). Quantification of results from 3 biological repeats  $\pm$ SE, N=12. Asterisks indicate significance in one-way ANOVA with a Tukey post hoc test, \*\*\*p<0.001, \*\*\*\*p<0.0001. (i-k) Dose response of *B. cinerea*, *S. rolfsii* and *F. oxysporum* to CK-different concentrations of 6-BAP as indicated. Graphs represent 3 biological repeats  $\pm$ SE, N>6. Letters



indicate significance in a one-way ANOVA, \*\*\*\* $p < 0.0001$  in all cases, with a Tukey post-hoc test. **j-k**: Box-plot displays minimum to maximum values, with inner quartile ranges indicated by box and outer-quartile ranges by whiskers. Line indicates median, dot indicates mean.

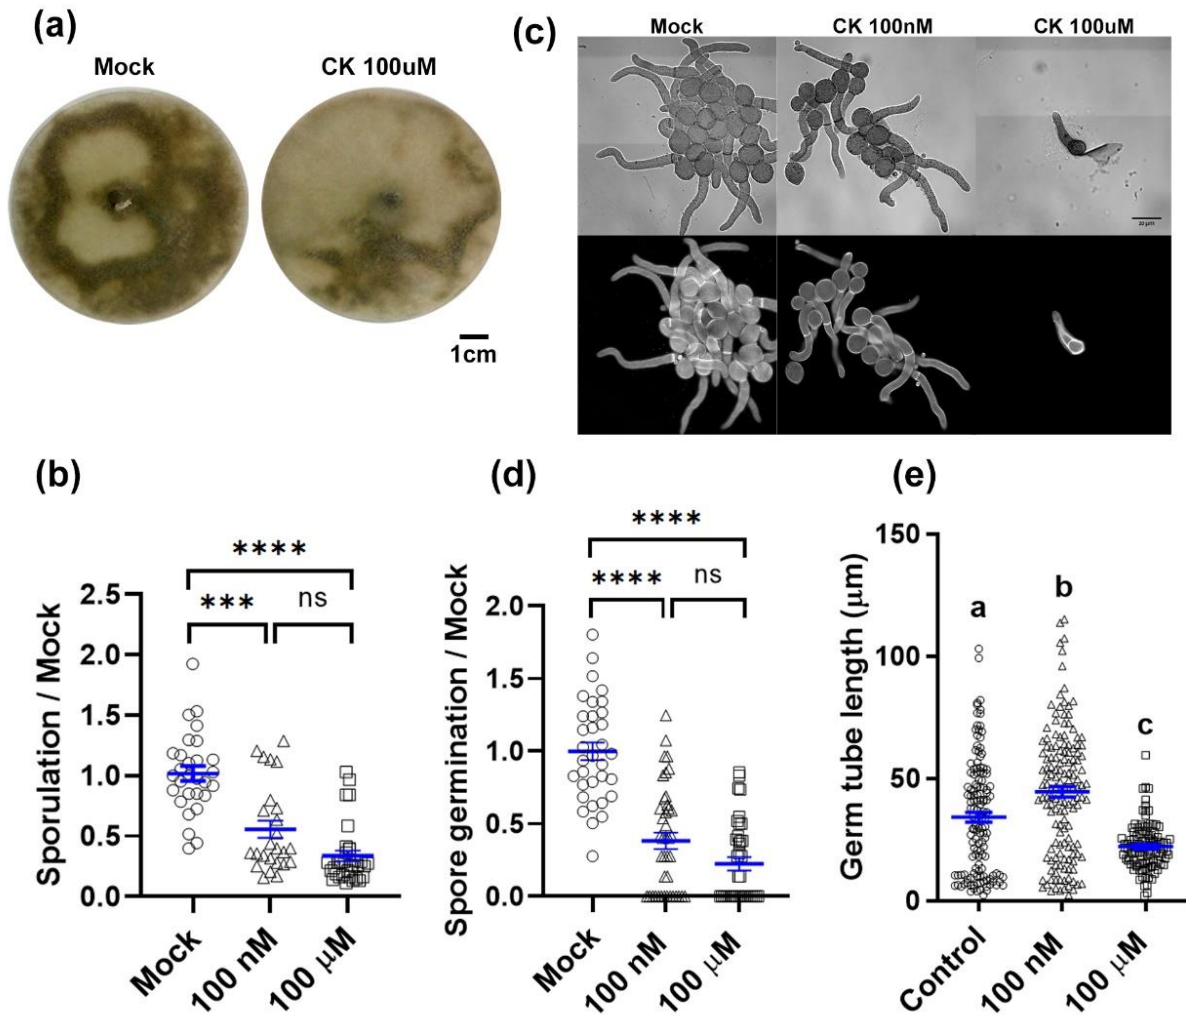

**Fig. 2. Cytokinin inhibits *Bc* sporulation and spore germination.**

(a)-(b) *B. cinerea* was cultured on PDA plates or PDB liquid broth in the presence of 100 nM or 100 μM 6-Benzylaminopurine (6-BAP). Spore formation is indicated by dark color (a) and quantified in (b). Spore germination and germ tube elongation are demonstrated in (c) with calcofluor staining (scale bar = 20 μm), and quantified in (d)-(e). (b,d,e) Quantification of results from 4 biological repeats ±SE, N>25. Asterisks or letters indicate significance in one-way ANOVA with a Tukey post hoc test, \*\*\*p<0.005, \*\*\*\*p<0.001. Individual values graphed, blue bar represents mean ±SE.

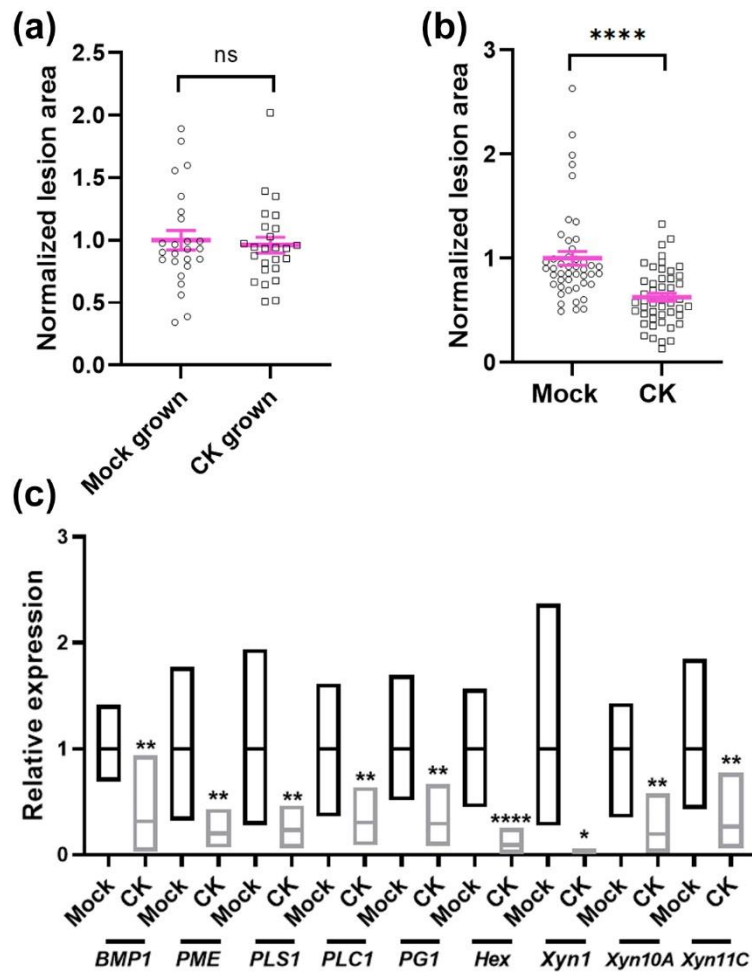

**Fig. 3. Cytokinin inhibits *B. cinerea* virulence.**

(a) Infectivity of spores sporulated from mycelia grown with or without cytokinin (CK; 6-Benzylaminopurine). Spores were harvested in a glucose/potassium media as described in the materials sections, and diluted to an equal concentration (the CK grown spores were concentrated as CK grown fungi produce reduced numbers). (b) Infectivity of spores grown in rich media and harvested from the same plate; half the spores were mixed with CK prior to infection. (c) *B. cinerea* was grown in PDB with the addition of 100  $\mu$ M CK (6-BAP) or without (Mock). qRT-PCR was carried out on the virulence genes *BMP1*, *PME*, *PLS1*, *PLC1*, *PG1*, *hex*, *XynI*, *Xyn10A* and *Xyn11C*. Mock was set to 1. Gene expression values were normalized to a geometric mean of the expression of 3 housekeeping genes: Ubiquitin-conjugating enzyme E2, Iron-transport multicopper oxidase, and Adenosine deaminase. Graph represents 3 biological repeats, N=9. **a-b**: individual values graphed, pink bar represents mean  $\pm$ SE. Results were analyzed for statistical significance using a two-tailed t-test, \*\*\*\* $p$ <0.0001; ns-non-significant. **c**: floating bars, line indicates mean. Results were analyzed for statistical significance using Welch's Anova with a Dunnett post hoc test, \* $p$ <0.05, \*\* $p$ <0.01, \*\*\*\* $p$ <0.0001.

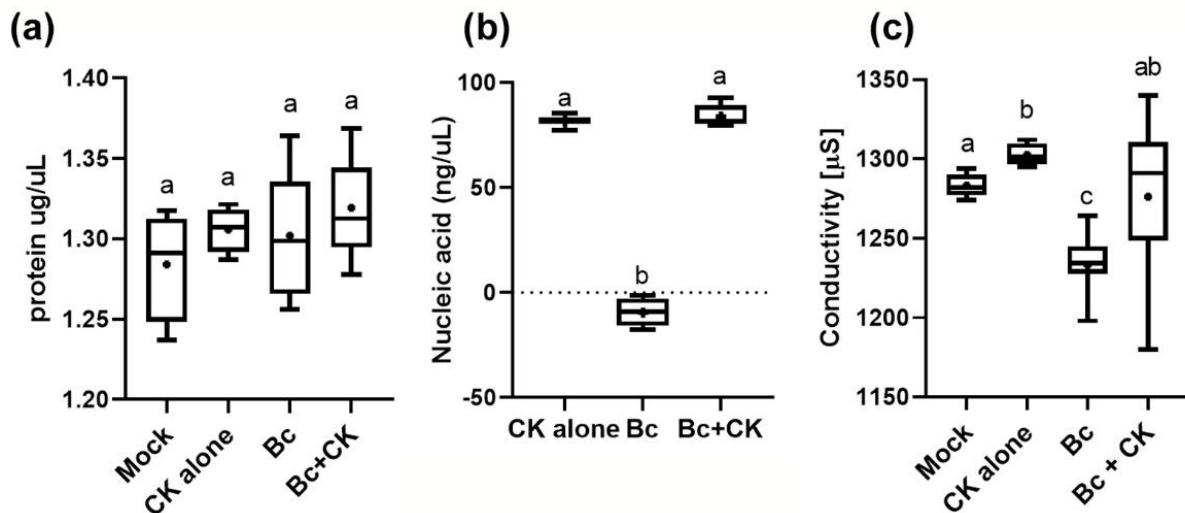

**Fig. 4. Cytokinin is not toxic to *B. cinerea*.**

*B. cinerea* (*Bc*) was cultured in PDB liquid broth, with or without 100  $\mu$ M CK (6-Benzylaminopurine). After 24 hours, protein leakage (a), nucleic acid leakage (b), and media conductivity (c) were measured. Graphs represent 3 biological repeats  $\pm$ SE,  $N > 6$ . Letters indicate significance in one-way ANOVA with a Tukey (a) or Bonferroni (b,c) post hoc test; a  $p = ns$ ; b,c  $p < 0.0001$ . Box-plot with 2.5% whiskers; line indicates median, dot indicates mean. No significant difference between control media containing CK (without *Bc*) or *Bc* with CK was observed in any of the parameters.

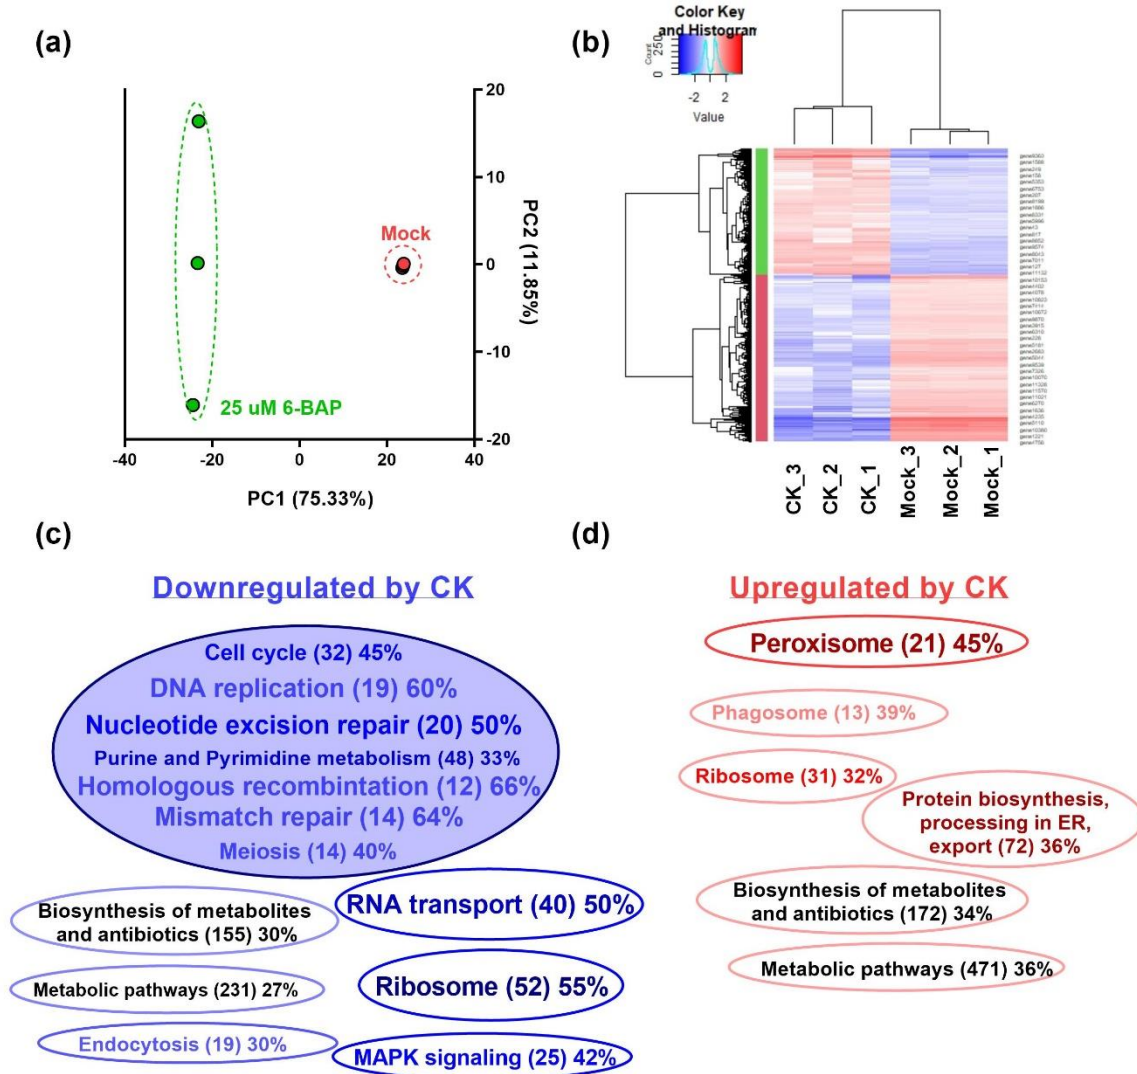

### Fig. 5. Transcriptomics reveal fungal pathways affected by CK

Analysis of Illumina Hiseq NGS of *Bc* samples Mock treated or CK treated (25 uM), 3 biological repeats each. Gene expression values were computed as FPKM. Differential expression analysis was completed using the DESeq2 R package. Genes with an adjusted p-value of no more than 0.05 and log2FC greater than 1 or lesser than -1 were considered differentially expressed. **(a)** Principle component analysis (PCA) of 3 biological repeats from each treatment. PCA was calculated using the R function prcomp. **(b)** Heatmap depicting the clustering of the different samples in terms of differentially expressed genes. Blue= negatively regulated by CK, red= positively regulated by CK. Color saturation indicates strength of differential expression. Heatmap visualization was performed using R Bioconductor. See also Supplemental data 1. **(c-d)** Analysis of statistically enriched pathways downregulated (c, blue) and upregulated (d, red) by CK. KOBAS 3.0 tool was used to detect the statistical enrichment of differential expression genes in Kyoto Encyclopedia of Genes and Genomes (KEGG) pathways and Gene Ontology (GO). Pathways were tested for significant enrichment using Fisher's exact test, with Benjamini and Hochberg FDR correction. Corrected p-value was deemed

significant at  $p < 0.05$ . See also Supplemental data 2 and 3. In (c-d), the darker the color the higher the number of DEGs in a pathway, and the bigger the letters, the higher percentage of the pathway that is differential.

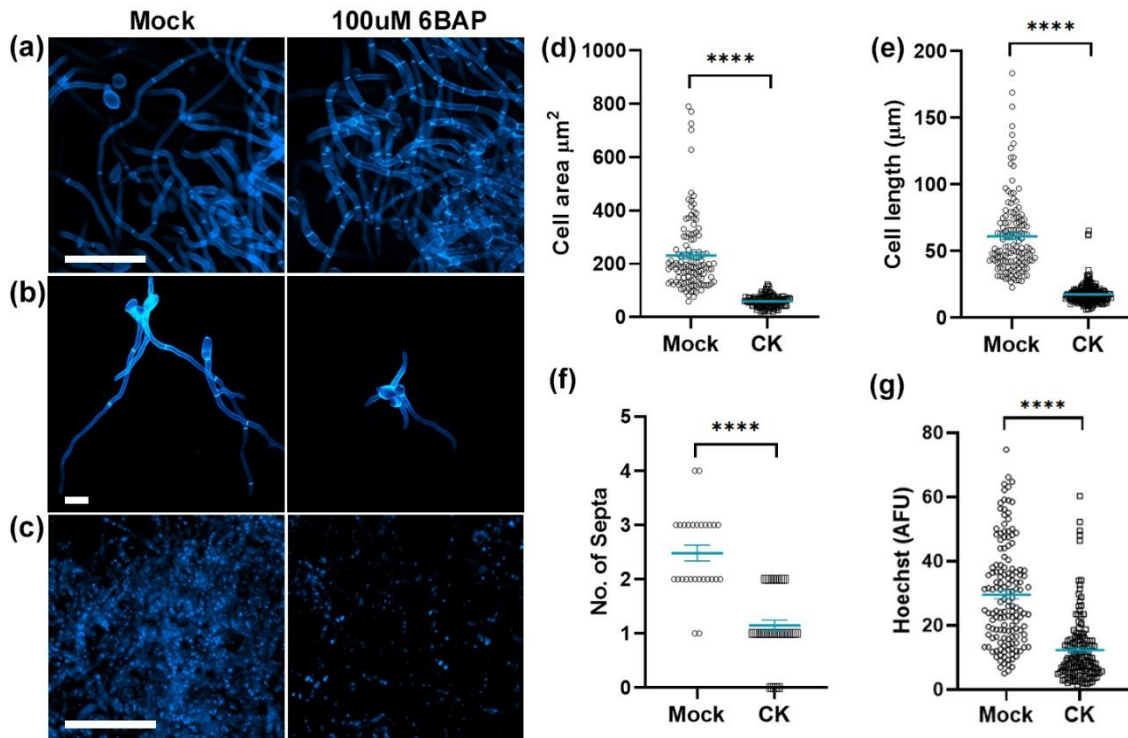

### Fig. 6. Cytokinin reduces *B. cinerea* cell elongation and DNA replication

*B. cinerea* was cultured in PDB liquid broth, with or without 100  $\mu$ M CK (6-Benzylaminopurine). After 8 (f) or 16 hours (a-e,g), growing hyphae were stained with calcofluor (a,b,d,e,f) or hoechst (c,g), and imaged on an Olympus IX 81 confocal laser scanning microscope using a 405nm diode laser (1% power), under identical imaging conditions. a-c: bar=50  $\mu$ M; b: bar=20  $\mu$ M. Cell area (d), distance between septa (e), No. of septa in individual germinated hyphae (f) and DNA staining (g) were measured using Fiji-ImageJ. Graphs represent 3-6 biological repeats, N>120 (d,e), N>30 (f), N=170 (g). Statistically significant differences between Mock and CK samples were assessed using a two-tailed t-test, \*\*\*\*p<0.0001. Individual values graphed, blue bar represents mean  $\pm$ SE.





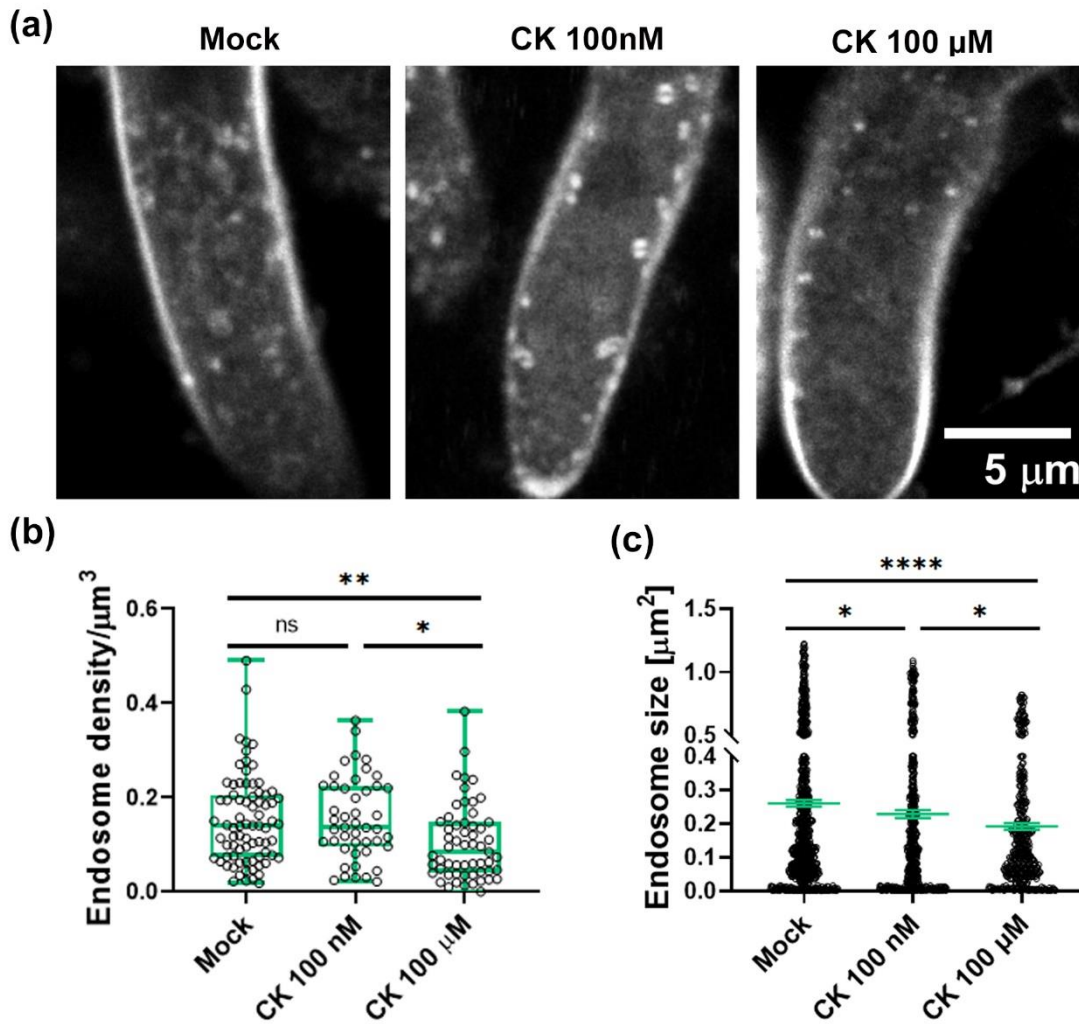

**Fig. 8. Cytokinin inhibits FM-4-64 endocytosis in growing *B. cinerea* hyphae.**

*B. cinerea* (*Bc*) was cultured in PDB liquid broth in the presence of 100 nM or 100 μM CK (6-Benzylaminopurine) for 16 hours. (a) FM-4-64 endocytic vesicles in *Bc* hyphae. (b) quantification of the amount of endocytic vesicles; (c) quantification of the average size of vesicles. Measurements were done using the counting tool of Fiji. Quantification of results from 7 biological repeats. **b**: N>45, box-plot with all values displayed, box indicates inner-quartile ranges with line indicating median, whiskers indicate outer-quartile ranges. **c**: N>450, all values displayed, line indicates median ±SE. Asterisks indicate significance in one-way ANOVA with a Tukey post hoc test, \*p<0.05; \*\*p<0.01; \*\*\*\*p<0.0001; ns- non-significant.

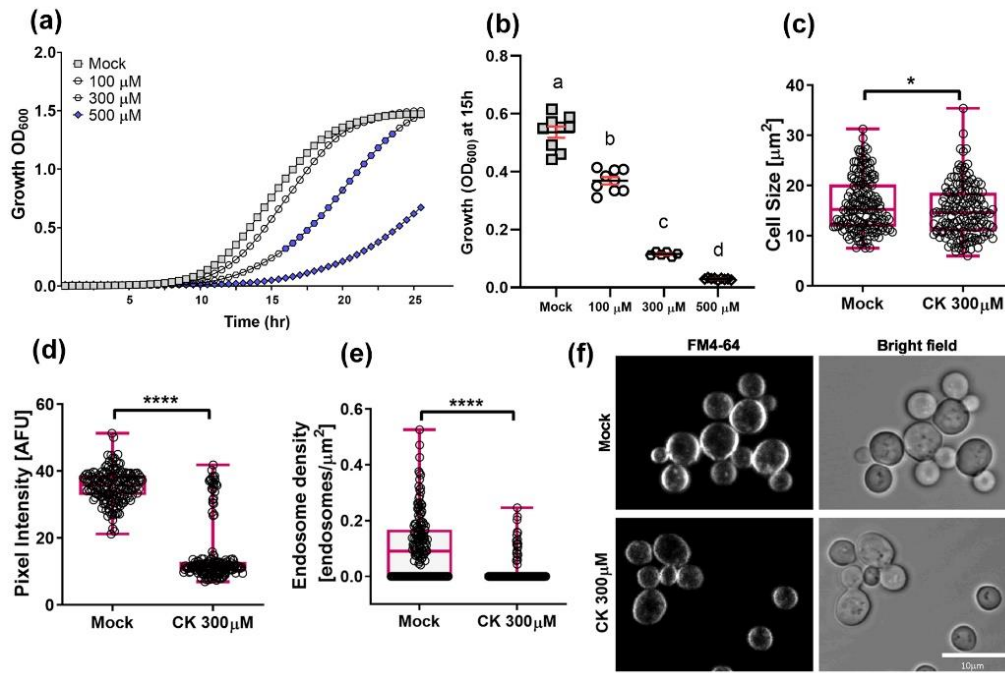

**Fig. 9. Cytokinin inhibits growth and endocytosis in budding yeast.**

(a) Wild-type *Saccharomyces cerevisiae* were grown overnight at 30°C in minimal synthetic defined medium, treated with either 10uM NaOH (Mock) or with the addition of indicated concentrations of CK (6-Benzylaminopurine). Cells were incubated at 30°C for 25h, with continuous shaking. Average growth per time point for 3 experiments is presented, N=9. Blue color represents statistical significance from Mock treatment in a two-tailed t-test with Holm-Sidak correction,  $p < 0.05$ . (b) Average growth (OD) at mid log phase (15h) in three independent experiments. Letters indicate significance in a one-way ANOVA with a post hoc Tukey test;  $p < 0.0001$ . All points displayed; red lines indicate mean  $\pm$  SE. (c-f) *S. cerevisiae* yeast cells were grown overnight at 30°C in YPD medium, diluted ( $OD_{600} = 0.2$ ) and incubated for 6 hours in YPD media (Mock) or media supplemented with 300  $\mu$ M CK (6-Benzylaminopurine). Cells were incubated with 24  $\mu$ M FM4-64 (Invitrogen) at 4°C for 30 min. Subsequently, the FM4-64 containing medium was replaced with fresh medium and cultures was incubated at 28°C for 15 minutes. Confocal microscopy images were acquired using a Zeiss LSM780 confocal microscope. (c) cell size; (d) total internalized FM4-64 per cell represented by pixel intensity; (e) endosome density. (f) Representative images, Bar, 10  $\mu$ m. Box-plots with all values displayed; line indicates median. c-e: N>160. Image analysis was performed using Fiji-ImageJ with raw images collected from 3 independent biological experiments. Endosome count measurements were done with the 3D Object counter tool and pixel intensity was measured using the measurement analysis tool. Asterisks represent statistical significance in a two-tailed t-test with a Mann-Whitney post hoc test, \* $p < 0.05$ , \*\*\*\* $p < 0.0001$ .

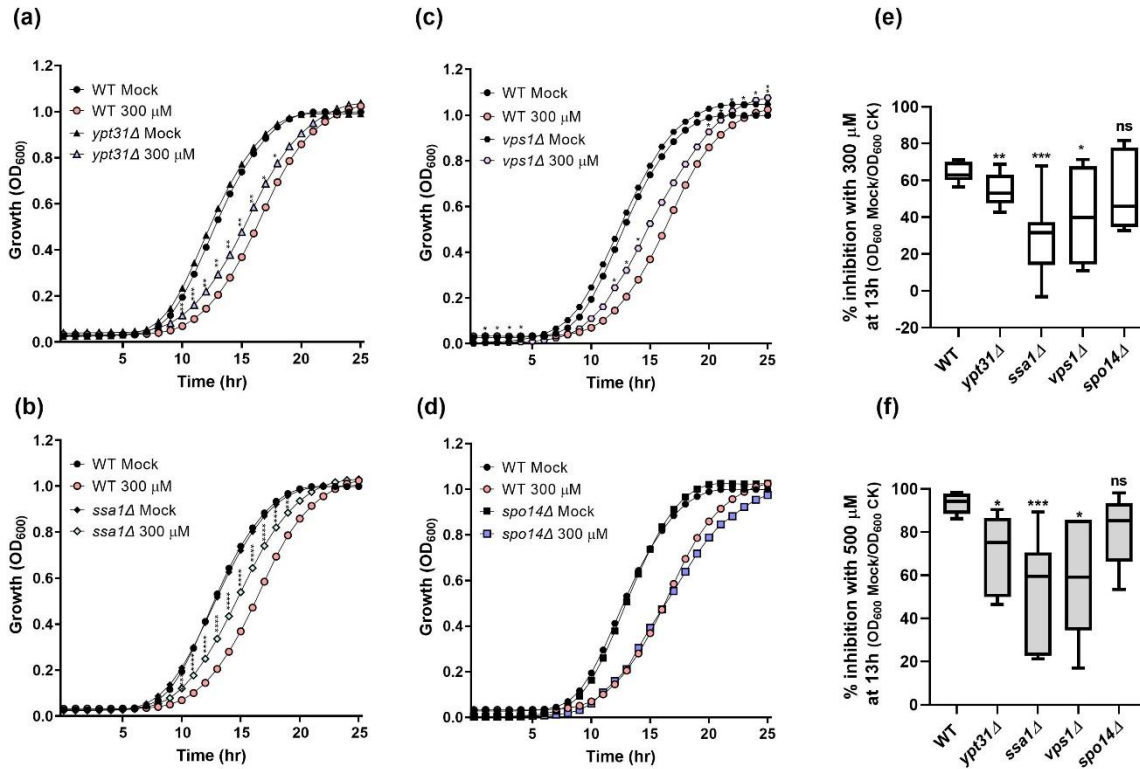

**Fig. 10. Cytokinin mediated growth inhibition is partially rescued in budding yeast endocytic mutants.**

*S. cerevisiae* Wild-type (WT, a-f), *ypt31Δ* (a,e,f), *ssa1Δ* (b,e,f), *vps1Δ* (c,e,f) and *spo14Δ* (d,e,f) were grown over night at 30°C for 25 h, in minimal synthetic defined medium, treated with either 10 μM NaOH (Mock) or with the addition of 300 μM (a-e) or 500 μM (f) CK (6-Benzylaminopurine).

(a-d) Average growth per time point for three experiments is presented, N=9. Asterisks indicate statistical significance of each mutant with CK compared to WT with CK, in a two-tailed t-test with Holm-Sidak correction, \*p<0.05, \*\*p<0.01, \*\*\*p<0.001, \*\*\*\*p<0.0001.

(e-f) Percentage of growth inhibition of each strain with 300μM CK (e) and 500 μM CK (f) as compared to mock treatment, at 13 h, in three independent experiments, N=9. Boxplots are shown with inter-quartile-ranges (box), medians (black line in box), and outer quartile whiskers, minimum to maximum values. Asterisks indicate significance in a one-way ANOVA with a post hoc Tukey test; \*p<0.05; \*\*p<0.01; \*\*\*p<0.001; ns (non-significant).

## Cytokinin inhibits fungal development and virulence by targeting the cellular cytoskeleton and trafficking

### Supplemental Information

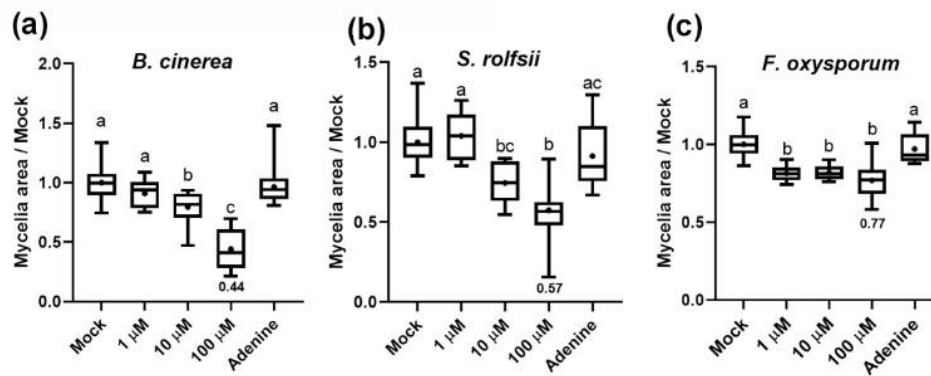

**Fig. S1. Direct effect of cytokinin on mycelial growth of phytopathogenic fungi: 6-BAP dose response**

Dose response of *B. cinerea* (a), *S. rolfsii* (b) and *F. oxysporum* (c) to CK- different concentrations of 6-Benzylaminopurine as indicated. Graphs represent 3 biological repeats  $\pm$ SE, N>6. Letters indicate significance in a one-way ANOVA, \*\*\*\*p<0.0001 in all cases, with a Tukey post-hoc test. Box-plot displays minimum to maximum values, with inner quartile ranges indicated by box and outer-quartile ranges by whiskers. Line indicates median, dot indicates mean.

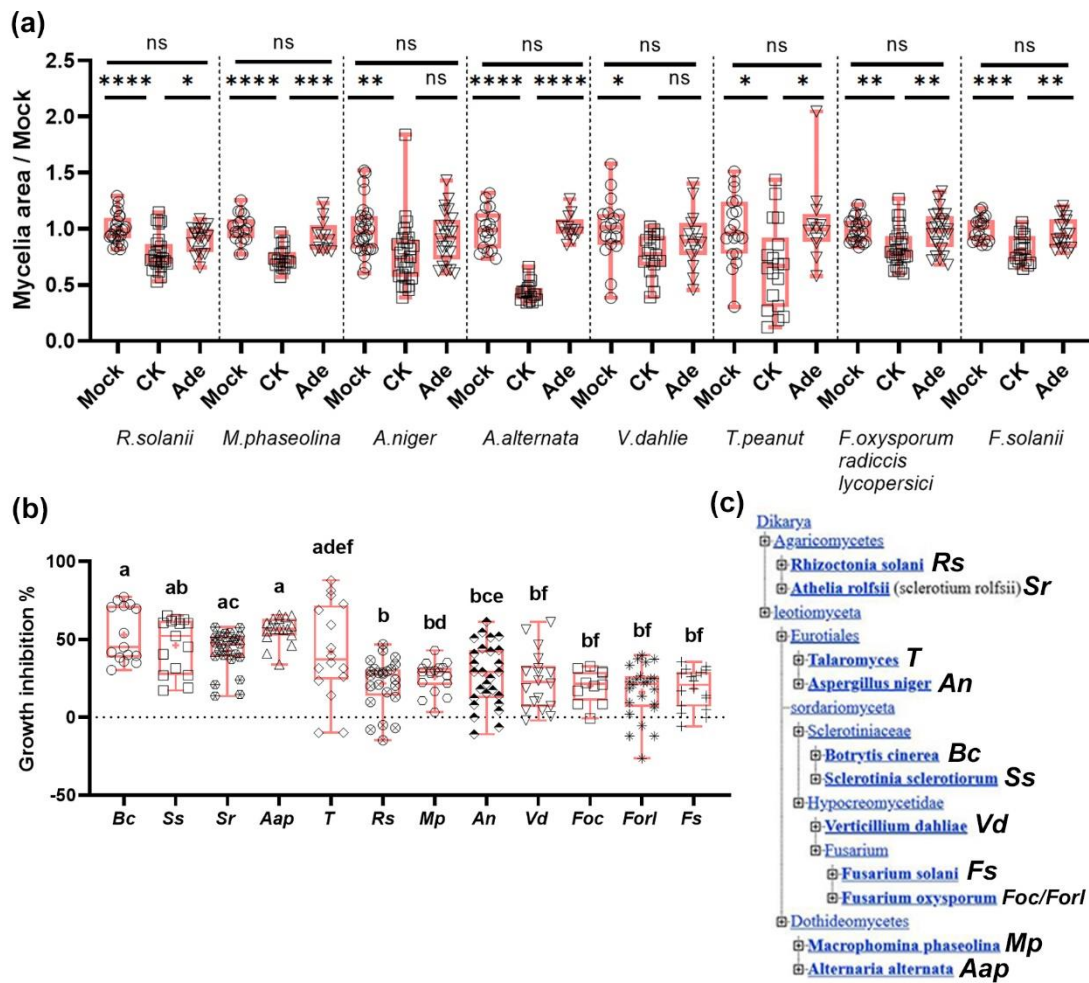

**Fig. S2. Cytokinin inhibits fungal growth.**

**(a)** Growth of different fungi cultured on potato dextrose agar (PDA) plates in the presence of 100  $\mu$ M CK (6-Benzylaminopurine), or the control Adenine (Ade). Quantification of results from 4-6 biological repeats  $\pm$ SE, N>12. Asterisks indicate significance in one-way ANOVA with a Tukey post hoc test, \*p<0.05, \*\*p<0.01, \*\*\*p<0.001; \*\*\*\*p<0.0001; ns (non-significant). **(b)** Comparison of the inhibition level of CK for different fungi. Letters indicate significance in a two-tailed t-test, p<0.004. The phylogeny is detailed in **(c)**. **a-b:** Box plots with all individual values shown, line indicates median.

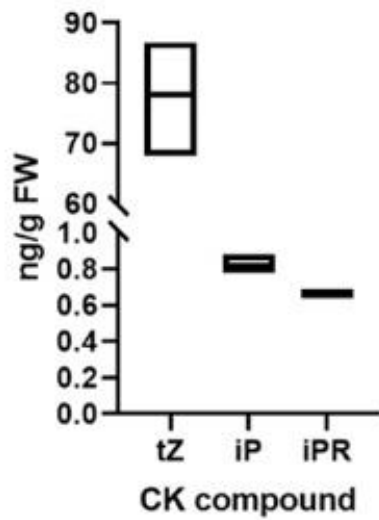

**Fig. S3. Quantification of active CKs in tomato leaves using LC-MS-MS.**

Fresh ground tissue powder was iso-propanol/methanol extracted in the presence of deuterium-labelled internal standards. LC-MS-MS analyses were conducted using a UPLC-Triple Quadrupole MS (WatersXevo TQMS). Acquisition of LC-MS data was performed using Mass Lynx V4.1 software (Waters). Quantification of CKs (tZ, trans zeatin, iP, isopentenyladenine and iPR, iP riboside) was done using isotope-labeled internal standards (IS), as described in the methods section. Quantification of results from 3 biological replicas  $\pm$ SE. Bars represent minimum-maximum values range, with line indicating mean.

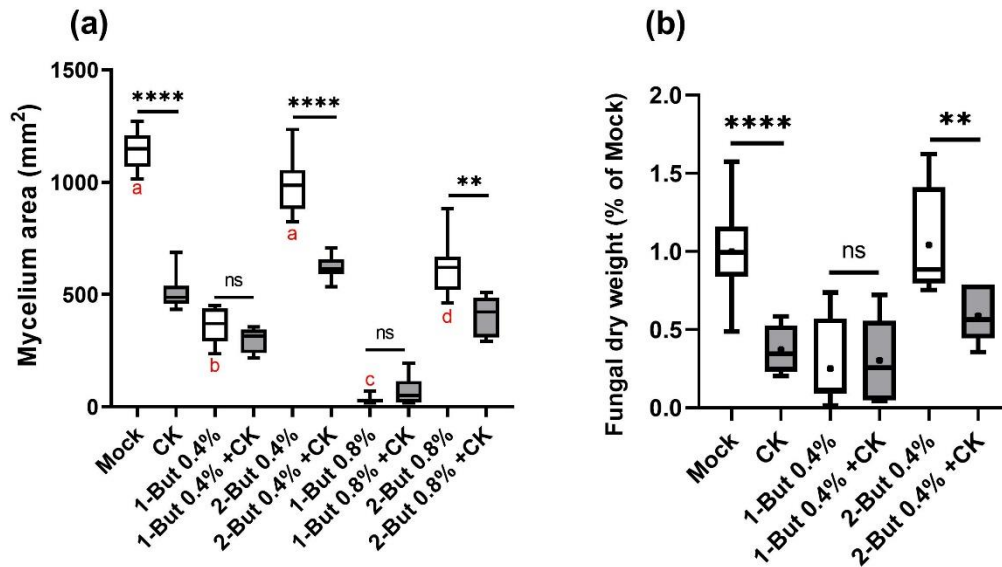

**Fig. S4. Inhibition of endocytosis abolishes *B. cinerea* cytokinin sensitivity**

*B. cinerea* was cultured on 1/2 PDA plates (a) or in PDB liquid broth (b) in the presence or absence of 100  $\mu$ M CK (6-Benzylaminopurine), the endocytosis inhibitor 1-butanol (v/v%), or control compound 2-butanol (v/v%) for 48 (a) or 96 (b) hours. **(a)** Mycelium area; measurements were done using Fiji. **(b)** Dry weight %. Quantification of results from 4 biological repeats  $\pm$ SE, a: N>6, b: N>9. Boxplots are shown with inter-quartile-ranges (box), medians (black line in box), means (dot) and outer quartile whiskers, minimum to maximum values. Asterisks indicate significance in one-way ANOVA with a Dunnett post hoc test, \*\* $p$ <0.01; \*\*\*\* $p$ <0.0001; ns (non-significant). Red letters in (a) indicate significance between the different treatments without CK in a one-way ANOVA with a Dunnett post hoc test,  $p$ <0.01.

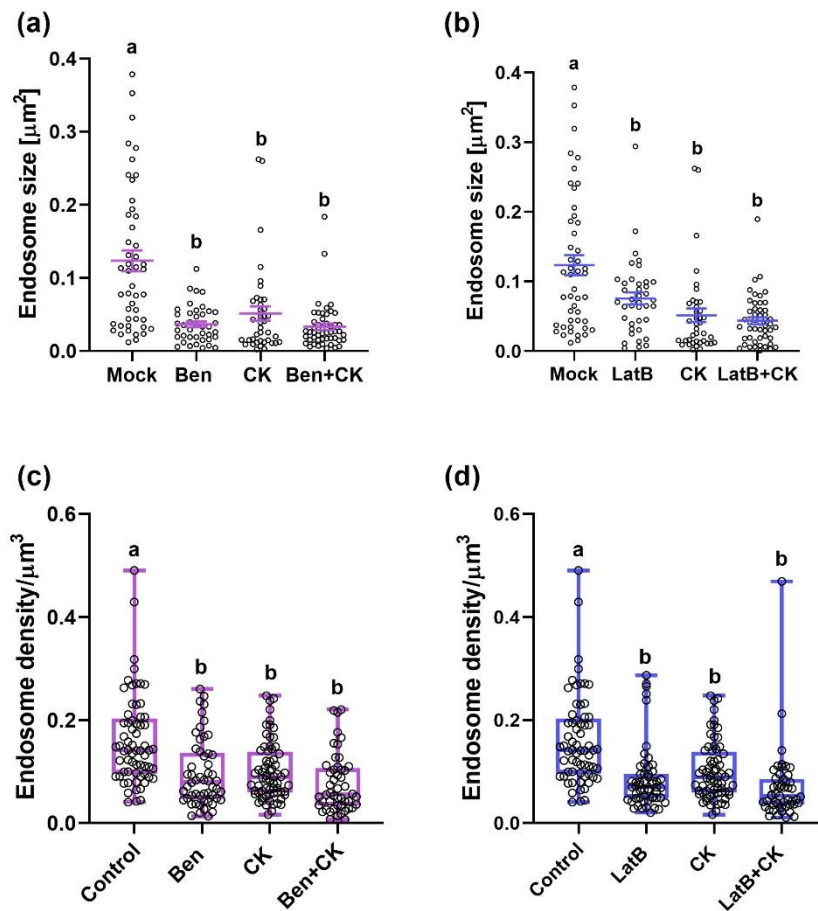

**Fig. S5. Inhibition of the cellular cytoskeleton abolishes *B. cinerea* cytokinin sensitivity-cellular trafficking**

*B. cinerea* (*Bc*) was cultured in PDB liquid broth in the presence of 100  $\mu\text{M}$  CK (6-Benzylaminopurine) and/ or 1  $\mu\text{M}$  Benomyl (Ben; **a,c**) or Latrunculin B (LatB; **b,d**) for 8 hours. FM-4-64 endocytic vesicles were analyzed in growing hyphae. Measurements were done using the counting tool of Fiji. **(a,b)** Quantification of the average size of vesicles from 3 biological repeats,  $N > 40$  images, the average endosome size per image was used for the analysis. All points displayed, mean  $\pm$ SE is indicated. **(c,d)** Quantification of the amount of endocytic vesicles from 5 biological repeats,  $N > 50$  images. Box-plots with all values displayed, box indicates inner-quartile ranges with line indicating median, whiskers indicate outer-quartile ranges. Different letters indicate significance between samples in a one-way ANOVA with a Dunnett post hoc test, a,b:  $p < 0.0059$ ; c,d:  $p < 0.0001$ .



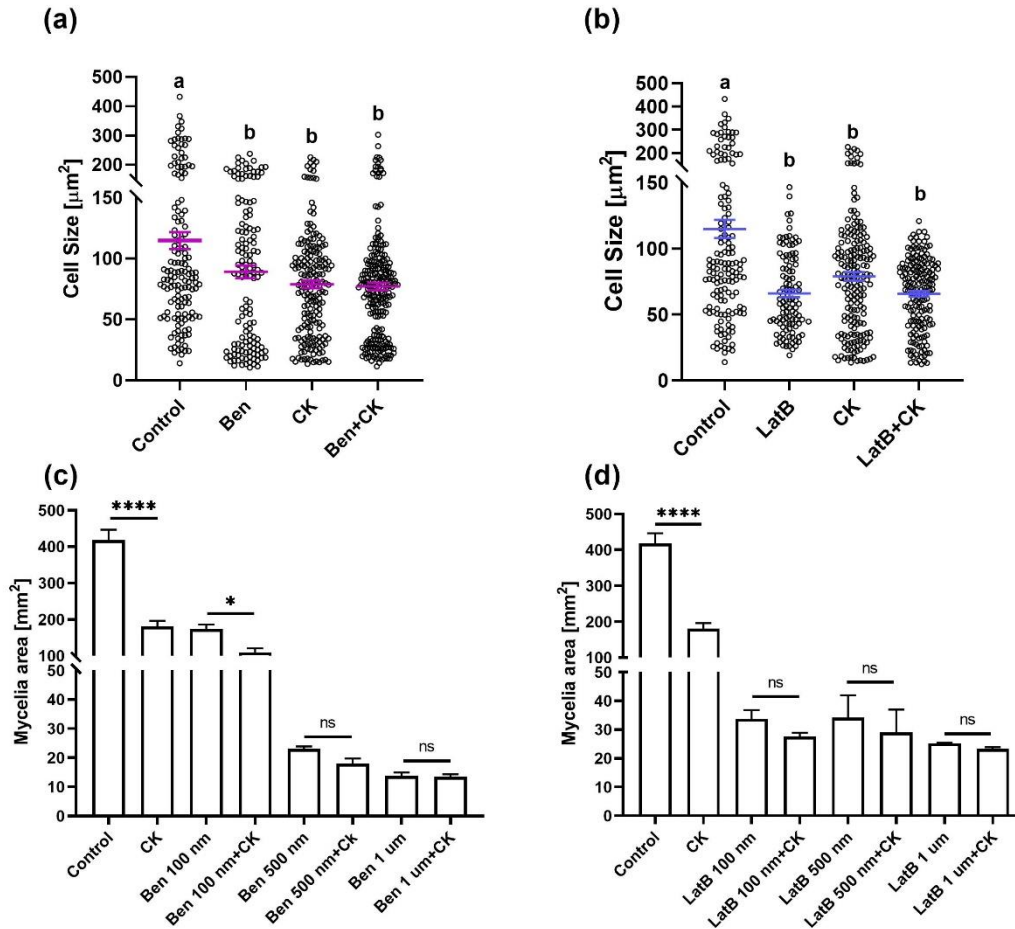

**Fig. S6. Inhibition of the cellular cytoskeleton abolishes *B. cinerea* cytokinin sensitivity-cell cycle and growth**

(a-b) *B. cinerea* (*Bc*) was cultured in PDB liquid broth in the presence of 100 µM CK (6-Benzylaminopurine) and/ or 1 µM Benomyl (Ben; a) or Latrunculin B (LatB; b) for 8 hours. Cell size was quantified in 3 experiments, N>100. All points displayed, mean ±SE is indicated. Different letters indicate significance between samples in a one-way ANOVA with a Dunnett post hoc test, p<0.021.

(c-d) *B. cinerea* (*Bc*) was cultured on PDA plates in the presence of 100 µM CK (6-Benzylaminopurine) and/ or indicated concentrations of Benomyl (Ben; c) or Latrunculin B (LatB; d) for 48 hours. Graph represents mean ±SE, N=3. Asterisks indicate significance between samples in a one-way ANOVA with a Bonferroni post hoc test, \*p<0.05; \*\*\*\*p<0.0001; ns=not significant.

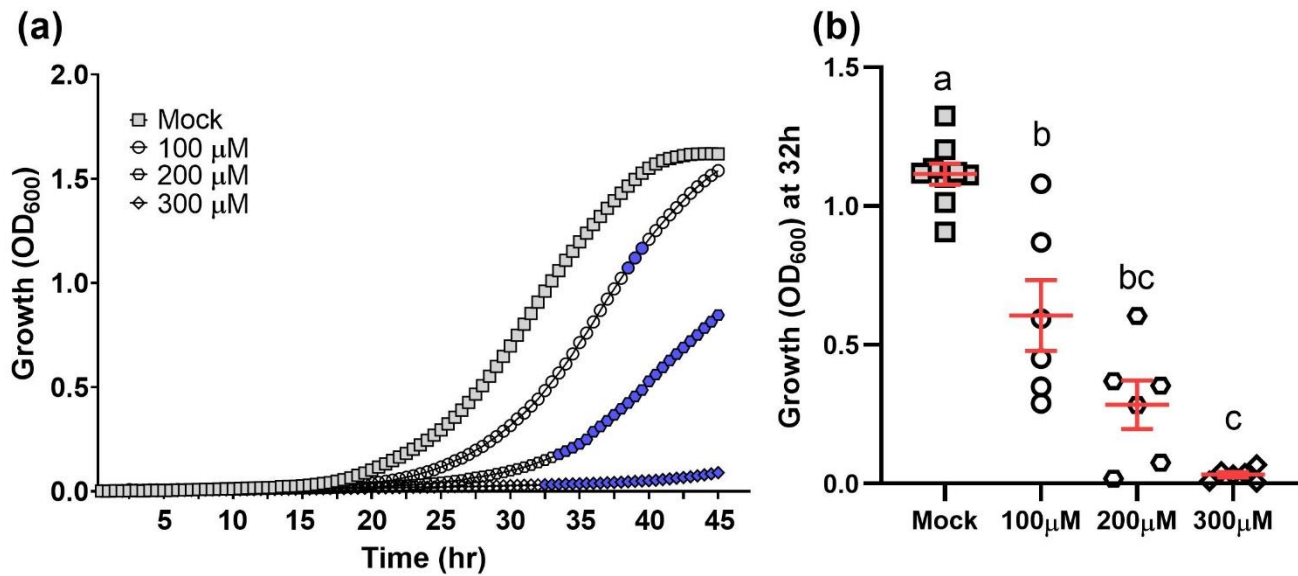

**Fig. S7. Cytokinin inhibits the growth of fission yeast.**

(a) Wild-type *Schizosaccharomyces pombe* cells were grown over night at 30°C in minimal EMM medium, treated with either 10uM NaOH (Mock) or with the addition of indicated concentrations of CK (6-Benzylaminopurine). Cells were incubated at 30°C for 45h, with continuous shaking. Average growth per time point for three independent experiments is presented, N=6. Blue color represents statistical significance in a two-tailed t-test with Holm-Sidak correction,  $p < 0.05$ . (b) Average growth (OD) at mid log phase (32h) in three independent experiments. Letters indicate significance in a one-way ANOVA with a post hoc Tukey test;  $p < 0.0001$ . All points displayed; red lines indicate mean  $\pm$  SE.

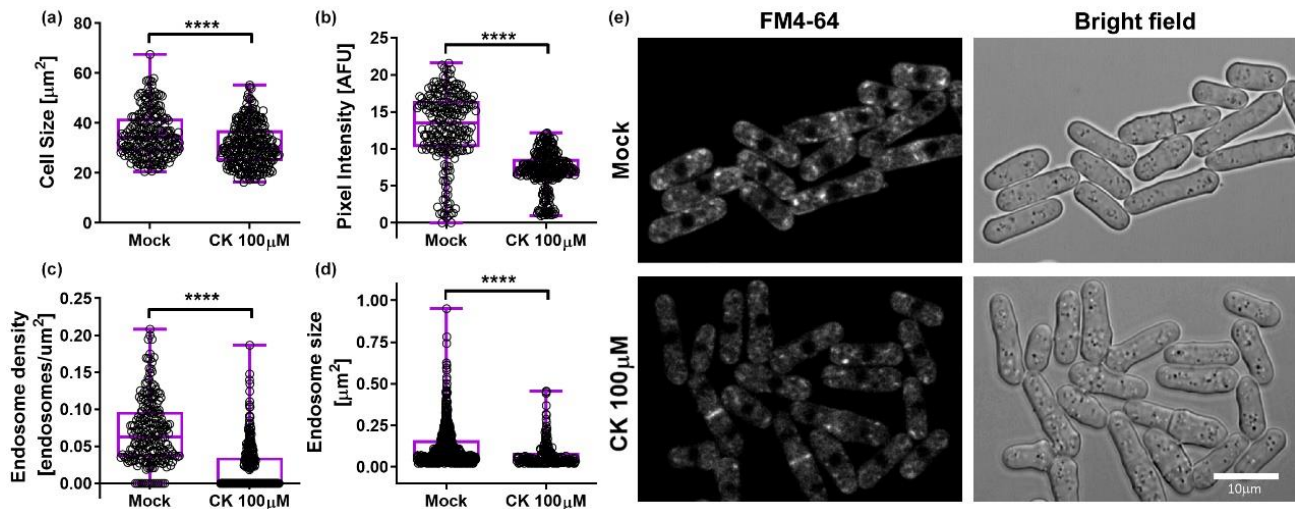

**Fig. S8. Cytokinin inhibits FM-4-64 endocytosis in fission yeast.**

*S. pombe* were grown overnight at 30°C in YE medium, diluted ( $OD_{600} = 0.2$ ) and incubated for 6 hours in YE medium (Mock) or medium supplemented with 100  $\mu\text{M}$  CK (6-Benzylaminopurine). Cells were incubated with 24  $\mu\text{M}$  FM4-64 (Invitrogen) at 4°C for 30 min. Subsequently, the FM4-64 containing medium was replaced with fresh medium and cultures was incubated at 28°C for 15 minutes. Confocal microscopy images were acquired using a Zeiss LSM780 confocal microscope system with Objective LD C-Apochromat 63 $\times$ /1.15 Corr. Acquisition settings were designed using an excitation laser wavelength of 514 nm (4% power). The emission was then collected in the range of 592–768 nm. Bright field was acquired using the T-PMT (transmitted light detector). **(a)** cell size; **(b)** total internalized FM4-64 per cell represented by pixel intensity; **(c)** endosome density; **(d)** endosome size. **(e)** Representative images, Bar, 10  $\mu\text{m}$ . Box-plots with all values displayed; line indicates median. **a-c:**  $N > 220$ ; **d:**  $N > 180$ . Image analysis was performed using Fiji-ImageJ with raw images collected from 3 independent biological experiments. Endosome count and size measurements were done with the 3D Object counter tool and pixel intensity was measured using the measurement analysis tool. Asterisks represent statistical significance in a two-tailed t-test with a Mann-Whitney post hoc test, \*\*\*\* $p < 0.0001$ .

## Supplementary Table 1

### Solvent gradients and MS-MS parameters for CK quantification.

#### Solvent gradient program for cytokinins:

| Time (min) | Phase A % | Phase B % |
|------------|-----------|-----------|
| Initial    | 95        | 5         |
| 0.5        | 95        | 5         |
| 14         | 50        | 50        |
| 15         | 5         | 95        |
| 18         | 5         | 95        |
| 19         | 95        | 5         |
| 22         | 95        | 5         |

#### LC-MS-MS parameters for quantifications:

| Analite<br>and IS   | Retention time<br>(min) | Ionization<br>Mode | MRM<br>transition<br>(m/z) | Dwell<br>time<br>(msec) | Cone<br>(V) | Collision<br>(V) |
|---------------------|-------------------------|--------------------|----------------------------|-------------------------|-------------|------------------|
| t-Z                 | 2.34                    | positive           | 220>202<br>220>136         | 78                      | 26          | 14<br>18         |
| <sup>2</sup> H5-t-Z | 2.35                    | positive           | 225>137<br>225>207         | 78                      | 22          | 18<br>12         |
| iP                  | 4.86                    | positive           | 204>136<br>204>69          | 30                      | 20          | 14<br>16         |
| <sup>2</sup> H6-iP  | 4.82                    | positive           | 210>137<br>210>75          | 30                      | 24          | 16<br>18         |

## Supplementary Table 2

Primers used in RT-qPCR.

| Gene                               | Sequence (5'-3')                                     | Primer Efficiency |
|------------------------------------|------------------------------------------------------|-------------------|
| <i>PGI</i>                         | F-GATGTTGGTTCCTCCAGCGATA<br>R-CCGGAGTTGATAGCGAGACAGT | 1.03              |
| <i>BMP1</i>                        | F-TCTTTCAATGTCAGCGAGCAA<br>R-TGCAAAGCTGAGCAGACAACA   | 1.03              |
| <i>PLC1</i>                        | F-TCCC GCAGGACTCGATAACT<br>R-TATGGCTTCCACTCGGGTTT    | 0.98              |
| <i>PLS1</i>                        | F-CGCCTTCCTCATCTCCATTC<br>R-CAACGACGAAGAAGCCATGAA    | 1.03              |
| <i>PME1</i>                        | F-GCCACCCAGTTCATCGGATA<br>R-CCGACGACGAGACATTTAGCA    | 0.99              |
| <i>PutXyn11A</i>                   | F-CTCATCGAATACTACATCGT<br>R-GTATTGCTTGAAGGTAGCA      | 1.01              |
| <i>Xyn10A</i>                      | F-GGAAAGATCTATGCATGGGATG<br>R-AGGTTGCTGAATCCAGGTTG   | 1.03              |
| <i>Xyn11C</i>                      | F-GAATCCTGGAAGTGCTAAGGC<br>R-TGCTCCGTCCTAACCACG      | 1.01              |
| <i>hex</i>                         | F-TCTACTTCAACGAGGCTTC<br>R-CACCAGATTGACCGAAAAC       | 0.98              |
| <i>Tubulin alpha</i>               | F-TCTTGCTTCGAGCCCAAC<br>R-ACAGCAGCGTGGACATCA         | 0.96              |
| <i>pfyl</i>                        | F-ACCGCCGAGACTGTTCAA<br>R-CCCACCACACATCATCCA         | 0.96              |
| <i>aft1</i>                        | F-ATCTGGCTGGTGGCACAT<br>R-CCCACCACACATCATCCA         | 1.00              |
| <i>sac6</i>                        | F-CCTCAACCTGCCTCCTGA<br>R-TCGCTCCCTTGTGTAGCC         | 1.02              |
| <i>smt</i>                         | F-AGCACCAAACCTCCGTTCCG<br>R-TAACTGCCAACGCAACGA       | 1.02              |
| <i>Ub (Ubiquitin)</i>              | F-CATCAACTCCAACGGAAGCA<br>R-TCGGTCGGTCTTGTAACGT      | 1.00              |
| Iron transport multicopper oxidase | F-GTTTTTGGGACCGGCTTT<br>R-GCCGCTTTTGAGGGAAAT         | 0.99              |
| Adenosine deaminase                | F-TGAGTGCCACGACGAAAA<br>R-ACTCCACCATTGCCTCCA         | 1.02              |

### Supplementary Table 3

Oligonucleotides used for generating and validating *Saccharomyces cerevisiae* mutant strains.

| Primer               | Sequence (5'-3')                                                                                            |
|----------------------|-------------------------------------------------------------------------------------------------------------|
| YPT31_Disruption_Fw  | GAATAACAATTTGACCTTTATTACAAGGCACTTT<br>GTTTAGGCCAGCAAAGGGATTCTGACGGCGTCT<br>GGGGATTTCAACAcggatccccgggtaattaa |
| YPT31_Disruption_Rev | AAAATTGTAAAAATATAGCACAGAATTAAAGGG<br>GAGAAGAGTCATTCACATGCAAGTGCGCAACT<br>GCTGCAAATATCTCgaattcgagctcgtttaaac |
| YPT31_val_Fw         | GTGCGGGTGCTAAATTAGAGA                                                                                       |
| YPT31_val_Rev        | GATGAAGACGAAGAAGACGATG                                                                                      |
| SSA1_Disruption_Fw   | TCTATTTGTAAGATAAGCACATCAAAAGAAAAG<br>TAATCAAGTATTACAAGAAACAAAATTCAAGT<br>AAATAACAGATAATcggatccccgggtaattaa  |
| SSA1_Disruption_Rev  | AAAAACGTTTCGGAAAATTCCTCATTATACCCAG<br>ATCATTAAGACATTTTCGTTATTATCAATTGCC<br>GCACCAATTGGCgaattcgagctcgtttaaac |
| SSA1_val_Fw          | CTTCGAGAAGGGATTGAGTTG                                                                                       |
| SSA1_val_Rev         | GTAGCAGTACTTCAACCATTAG                                                                                      |
| VPS1_Disruption_Fw   | TAAAAAGAATTAGAGAGGCCTTTTATAGC<br>ACCAAATAAGGACCGTACGAAAACACTGCACATT<br>TTATATTATCAGATATCcggatccccgggtaattaa |
| VPS1_Disruption_Rev  | CAATATATAAGATTTGCAGTAAATATTAGGGAGA<br>AATACTCAAACCAAGCTTGAGTCGACCGGTAT<br>AGATGAGGAAAACgaattcgagctcgtttaaac |
| VPS1_val_Fw          | CGTCGCTTTGCCATCAAGAGA                                                                                       |
| VPS1_val_Rev         | AGACTAGCTTCCACGTATAC                                                                                        |

|                      |                                                                                                               |
|----------------------|---------------------------------------------------------------------------------------------------------------|
| SPO14_Disruption_Fw  | CGACCGGTCACTGATAATTCACACGACGCATTG<br>AGAGGCACGTACGCAAGAAGAAAAGGTAGGAT<br>AGATAAACAAGGGTGcggatccccgggtaattaa   |
| SPO14_Disruption_Rev | TATGTATCAGCGTCGAATGCTTATAACAGATAAA<br>AGGAAAATACAGGTAATGGTGTGTTCCCTGGTCG<br>TTTTTATATTCCCgaattcgagctcgtttaaac |
| SPO14_val_Fw         | GCAGGAC ATTATAGGCA CGA                                                                                        |
| SPO14_val_Rev        | GCAATAATGACACTATGGACC                                                                                         |

## Supplementary Table 4

Oligonucleotides used for generating and validating *Botrytis cinerea* mutant strains.

| <b>Primer</b> | <b>Sequence (5'-3')</b>    |
|---------------|----------------------------|
| GA 34F        | CGGGTGAATGGGATTCATTG       |
| GA 34R        | GCCCGCATTGGATTAATAATTG     |
| GA 44F        | GCCACAGACTCCGCCAGATTCTAATG |
| GA 44R        | CAACCATTTACGCTGCGACCACC    |
| GA 31F        | GCAACTAGTGATATTGAAGG       |
| GA 31R        | CATCTACTCTATTCCTTTGC       |
